# Supplementary material for: Dynamics of microRNA expression during mouse prenatal development
Source: HighWire-hosted journal article supplement (doi:10.1101/gr.248997.119), 2019-10-23
Supplement: Supplemental_Table_S2.xlsx [file Supplemental_Table_S2.xlsx]

## Sheet: Sheet1
	List of top ten expressed miRNAs in mouse tissues
	stage	tissue	replicate	Rank1	Rank2	Rank3	Rank4	Rank5	Rank6	Rank7	Rank8	Rank9	Rank10
	e10.5	forebrain	1	mmu-miR-16-5p	mmu-miR-335-5p	mmu-miR-26a-5p	mmu-miR-9-5p	mmu-miR-9-3p	mmu-miR-17-5p	mmu-miR-99a-5p	mmu-miR-20a-5p	mmu-miR-181b-5p	mmu-miR-126a-3p
	e10.5	forebrain	2	mmu-miR-16-5p	mmu-miR-335-5p	mmu-miR-26a-5p	mmu-miR-17-5p	mmu-miR-20a-5p	mmu-miR-9-5p	mmu-miR-99a-5p	mmu-miR-126a-3p	mmu-miR-9-3p	mmu-miR-181b-5p
	e11.5	forebrain	1	mmu-miR-16-5p	mmu-miR-335-5p	mmu-miR-9-5p	mmu-miR-99a-5p	mmu-miR-26a-5p	mmu-miR-9-3p	mmu-miR-181b-5p	mmu-miR-99b-5p	mmu-miR-126a-3p	mmu-miR-130a-3p
	e11.5	forebrain	2	mmu-miR-16-5p	mmu-miR-335-5p	mmu-miR-9-5p	mmu-miR-99a-5p	mmu-miR-181b-5p	mmu-miR-26a-5p	mmu-miR-9-3p	mmu-miR-99b-5p	mmu-miR-126a-3p	mmu-miR-20a-5p
	e12.5	forebrain	1	mmu-miR-16-5p	mmu-miR-99a-5p	mmu-miR-9-5p	mmu-miR-335-5p	mmu-miR-26a-5p	mmu-miR-9-3p	mmu-miR-181b-5p	mmu-let-7g-5p	mmu-miR-181a-5p	mmu-miR-149-5p
	e12.5	forebrain	2	mmu-miR-16-5p	mmu-miR-99a-5p	mmu-miR-26a-5p	mmu-miR-9-5p	mmu-miR-335-5p	mmu-miR-9-3p	mmu-miR-181b-5p	mmu-let-7g-5p	mmu-miR-181a-5p	mmu-miR-99b-5p
	e13.5	forebrain	1	mmu-miR-16-5p	mmu-miR-99a-5p	mmu-miR-9-5p	mmu-miR-9-3p	mmu-let-7g-5p	mmu-miR-26a-5p	mmu-miR-335-5p	mmu-miR-181a-5p	mmu-let-7f-5p	mmu-miR-181b-5p
	e13.5	forebrain	2	mmu-miR-16-5p	mmu-miR-99a-5p	mmu-miR-26a-5p	mmu-miR-9-5p	mmu-miR-9-3p	mmu-let-7g-5p	mmu-let-7f-5p	mmu-miR-335-5p	mmu-miR-181a-5p	mmu-let-7i-5p
	e14.5	forebrain	1	mmu-miR-16-5p	mmu-miR-99a-5p	mmu-miR-9-5p	mmu-miR-9-3p	mmu-let-7i-5p	mmu-let-7g-5p	mmu-let-7f-5p	mmu-miR-181a-5p	mmu-miR-26a-5p	mmu-miR-335-5p
	e14.5	forebrain	2	mmu-miR-16-5p	mmu-miR-99a-5p	mmu-let-7g-5p	mmu-miR-9-3p	mmu-miR-9-5p	mmu-let-7f-5p	mmu-miR-181a-5p	mmu-miR-26a-5p	mmu-let-7i-5p	mmu-miR-100-5p
	e15.5	forebrain	1	mmu-miR-16-5p	mmu-miR-99a-5p	mmu-miR-9-5p	mmu-miR-26a-5p	mmu-let-7g-5p	mmu-miR-9-3p	mmu-let-7f-5p	mmu-miR-181a-5p	mmu-let-7i-5p	mmu-let-7a-5p
	e15.5	forebrain	2	mmu-miR-16-5p	mmu-miR-99a-5p	mmu-miR-9-5p	mmu-miR-9-3p	mmu-miR-26a-5p	mmu-let-7g-5p	mmu-let-7f-5p	mmu-miR-181a-5p	mmu-miR-125b-5p	mmu-let-7i-5p
	e16.5	forebrain	1	mmu-miR-16-5p	mmu-miR-99a-5p	mmu-miR-26a-5p	mmu-let-7g-5p	mmu-let-7f-5p	mmu-miR-9-5p	mmu-miR-9-3p	mmu-miR-181a-5p	mmu-let-7a-5p	mmu-let-7i-5p
	e16.5	forebrain	2	mmu-miR-16-5p	mmu-miR-99a-5p	mmu-let-7f-5p	mmu-miR-26a-5p	mmu-miR-9-5p	mmu-let-7g-5p	mmu-miR-9-3p	mmu-miR-181a-5p	mmu-let-7c-5p	mmu-let-7a-5p
	P0	forebrain	1	mmu-miR-99a-5p	mmu-miR-16-5p	mmu-miR-9-3p	mmu-miR-26a-5p	mmu-miR-181a-5p	mmu-let-7g-5p	mmu-let-7f-5p	mmu-miR-9-5p	mmu-let-7c-5p	mmu-miR-125b-5p
	P0	forebrain	2	mmu-miR-16-5p	mmu-miR-99a-5p	mmu-miR-9-3p	mmu-let-7f-5p	mmu-miR-181a-5p	mmu-let-7g-5p	mmu-miR-9-5p	mmu-miR-26a-5p	mmu-let-7c-5p	mmu-let-7a-5p
	e10.5	midbrain	1	mmu-miR-16-5p	mmu-miR-99a-5p	mmu-miR-335-5p	mmu-miR-26a-5p	mmu-miR-100-5p	mmu-miR-181b-5p	mmu-miR-20a-5p	mmu-miR-17-5p	mmu-miR-92b-3p	mmu-miR-126a-3p
	e10.5	midbrain	2	mmu-miR-16-5p	mmu-miR-335-5p	mmu-miR-26a-5p	mmu-miR-99a-5p	mmu-miR-17-5p	mmu-miR-20a-5p	mmu-miR-92b-3p	mmu-miR-100-5p	mmu-miR-126a-3p	mmu-miR-130a-3p
	e11.5	midbrain	1	mmu-miR-16-5p	mmu-miR-99a-5p	mmu-miR-335-5p	mmu-miR-181b-5p	mmu-miR-26a-5p	mmu-miR-126a-3p	mmu-miR-100-5p	mmu-miR-99b-5p	mmu-miR-130a-3p	mmu-miR-20a-5p
	e11.5	midbrain	2	mmu-miR-16-5p	mmu-miR-99a-5p	mmu-miR-335-5p	mmu-miR-26a-5p	mmu-miR-100-5p	mmu-miR-126a-3p	mmu-miR-99b-5p	mmu-miR-181b-5p	mmu-miR-20a-5p	mmu-miR-181a-5p
	e12.5	midbrain	1	mmu-miR-16-5p	mmu-miR-99a-5p	mmu-miR-26a-5p	mmu-miR-335-5p	mmu-miR-100-5p	mmu-miR-181b-5p	mmu-miR-9-5p	mmu-miR-181a-5p	mmu-miR-99b-5p	mmu-miR-17-5p
	e12.5	midbrain	2	mmu-miR-16-5p	mmu-miR-99a-5p	mmu-miR-26a-5p	mmu-miR-335-5p	mmu-miR-100-5p	mmu-miR-181b-5p	mmu-miR-9-5p	mmu-miR-181a-5p	mmu-miR-92b-3p	mmu-miR-99b-5p
	e13.5	midbrain	1	mmu-miR-16-5p	mmu-miR-99a-5p	mmu-miR-26a-5p	mmu-miR-181a-5p	mmu-miR-335-5p	mmu-miR-100-5p	mmu-let-7g-5p	mmu-miR-181b-5p	mmu-miR-9-5p	mmu-let-7f-5p
	e13.5	midbrain	2	mmu-miR-16-5p	mmu-miR-99a-5p	mmu-miR-26a-5p	mmu-miR-100-5p	mmu-let-7g-5p	mmu-miR-335-5p	mmu-miR-181a-5p	mmu-let-7f-5p	mmu-miR-9-5p	mmu-miR-181b-5p
	e14.5	midbrain	1	mmu-miR-16-5p	mmu-miR-99a-5p	mmu-miR-181a-5p	mmu-let-7g-5p	mmu-miR-9-5p	mmu-miR-26a-5p	mmu-miR-9-3p	mmu-let-7f-5p	mmu-let-7i-5p	mmu-miR-124-3p
	e14.5	midbrain	2	mmu-miR-16-5p	mmu-miR-99a-5p	mmu-miR-181a-5p	mmu-miR-9-5p	mmu-let-7g-5p	mmu-miR-26a-5p	mmu-miR-124-3p	mmu-miR-9-3p	mmu-miR-335-5p	mmu-let-7f-5p
	e15.5	midbrain	1	mmu-miR-16-5p	mmu-miR-99a-5p	mmu-miR-26a-5p	mmu-miR-181a-5p	mmu-let-7g-5p	mmu-miR-335-5p	mmu-let-7f-5p	mmu-let-7i-5p	mmu-miR-100-5p	mmu-miR-9-3p
	e15.5	midbrain	2	mmu-miR-16-5p	mmu-miR-99a-5p	mmu-miR-26a-5p	mmu-miR-181a-5p	mmu-let-7g-5p	mmu-miR-335-5p	mmu-let-7f-5p	mmu-miR-9-5p	mmu-miR-100-5p	mmu-let-7i-5p
	e16.5	midbrain	1	mmu-miR-99a-5p	mmu-miR-16-5p	mmu-miR-26a-5p	mmu-let-7g-5p	mmu-miR-181a-5p	mmu-let-7f-5p	mmu-miR-124-3p	mmu-miR-335-5p	mmu-let-7a-5p	mmu-miR-9-5p
	e16.5	midbrain	2	mmu-miR-99a-5p	mmu-miR-16-5p	mmu-miR-26a-5p	mmu-let-7g-5p	mmu-miR-181a-5p	mmu-let-7f-5p	mmu-miR-124-3p	mmu-miR-335-5p	mmu-miR-9-5p	mmu-miR-9-3p
	P0	midbrain	1	mmu-miR-99a-5p	mmu-miR-16-5p	mmu-miR-26a-5p	mmu-let-7g-5p	mmu-miR-181a-5p	mmu-let-7f-5p	mmu-miR-9-3p	mmu-miR-9-5p	mmu-miR-124-3p	mmu-miR-125b-5p
	P0	midbrain	2	mmu-miR-99a-5p	mmu-miR-16-5p	mmu-miR-26a-5p	mmu-let-7g-5p	mmu-miR-181a-5p	mmu-miR-124-3p	mmu-let-7f-5p	mmu-miR-9-3p	mmu-miR-9-5p	mmu-miR-335-5p
	e10.5	hindbrain	1	mmu-miR-16-5p	mmu-miR-335-5p	mmu-miR-99a-5p	mmu-miR-26a-5p	mmu-miR-100-5p	mmu-miR-92b-3p	mmu-miR-181b-5p	mmu-miR-126a-3p	mmu-miR-99b-5p	mmu-miR-9-5p
	e10.5	hindbrain	2	mmu-miR-16-5p	mmu-miR-335-5p	mmu-miR-26a-5p	mmu-miR-99a-5p	mmu-miR-100-5p	mmu-miR-126a-3p	mmu-miR-17-5p	mmu-miR-20a-5p	mmu-miR-322-5p	mmu-miR-181b-5p
	e11.5	hindbrain	1	mmu-miR-16-5p	mmu-miR-99a-5p	mmu-miR-335-5p	mmu-miR-100-5p	mmu-miR-26a-5p	mmu-miR-10a-5p	mmu-miR-99b-5p	mmu-miR-181b-5p	mmu-miR-126a-3p	mmu-miR-181a-5p
	e11.5	hindbrain	2	mmu-miR-16-5p	mmu-miR-99a-5p	mmu-miR-335-5p	mmu-miR-181b-5p	mmu-miR-26a-5p	mmu-miR-100-5p	mmu-miR-9-5p	mmu-miR-126a-3p	mmu-miR-99b-5p	mmu-miR-181a-5p
	e12.5	hindbrain	1	mmu-miR-16-5p	mmu-miR-99a-5p	mmu-miR-26a-5p	mmu-miR-100-5p	mmu-miR-335-5p	mmu-miR-181b-5p	mmu-miR-181a-5p	mmu-miR-9-5p	mmu-miR-9-3p	mmu-miR-10a-5p
	e12.5	hindbrain	2	mmu-miR-16-5p	mmu-miR-99a-5p	mmu-miR-26a-5p	mmu-miR-100-5p	mmu-miR-335-5p	mmu-miR-9-5p	mmu-miR-181b-5p	mmu-miR-9-3p	mmu-miR-181a-5p	mmu-miR-10a-5p
	e13.5	hindbrain	1	mmu-miR-99a-5p	mmu-miR-16-5p	mmu-miR-10a-5p	mmu-miR-181a-5p	mmu-miR-26a-5p	mmu-miR-100-5p	mmu-miR-9-3p	mmu-miR-9-5p	mmu-miR-335-5p	mmu-let-7g-5p
	e13.5	hindbrain	2	mmu-miR-16-5p	mmu-miR-99a-5p	mmu-miR-10a-5p	mmu-miR-9-5p	mmu-miR-181a-5p	mmu-miR-26a-5p	mmu-let-7g-5p	mmu-miR-9-3p	mmu-miR-100-5p	mmu-miR-335-5p
	e14.5	hindbrain	1	mmu-miR-99a-5p	mmu-miR-16-5p	mmu-miR-10a-5p	mmu-miR-181a-5p	mmu-miR-10b-5p	mmu-miR-9-5p	mmu-miR-9-3p	mmu-let-7g-5p	mmu-miR-26a-5p	mmu-let-7i-5p
	e14.5	hindbrain	2	mmu-miR-99a-5p	mmu-miR-16-5p	mmu-miR-10a-5p	mmu-miR-181a-5p	mmu-miR-9-3p	mmu-let-7g-5p	mmu-miR-9-5p	mmu-miR-10b-5p	mmu-miR-26a-5p	mmu-miR-124-3p
	e15.5	hindbrain	1	mmu-miR-99a-5p	mmu-miR-16-5p	mmu-miR-26a-5p	mmu-let-7g-5p	mmu-let-7f-5p	mmu-miR-10a-5p	mmu-miR-181a-5p	mmu-miR-9-3p	mmu-let-7i-5p	mmu-let-7a-5p
	e15.5	hindbrain	2	mmu-miR-99a-5p	mmu-miR-16-5p	mmu-miR-10a-5p	mmu-miR-26a-5p	mmu-let-7g-5p	mmu-miR-181a-5p	mmu-miR-9-3p	mmu-let-7f-5p	mmu-miR-9-5p	mmu-let-7i-5p
	e16.5	hindbrain	1	mmu-miR-99a-5p	mmu-miR-16-5p	mmu-miR-26a-5p	mmu-let-7g-5p	mmu-miR-10a-5p	mmu-let-7f-5p	mmu-miR-181a-5p	mmu-miR-9-3p	mmu-let-7i-5p	mmu-miR-9-5p
	e16.5	hindbrain	2	mmu-miR-99a-5p	mmu-miR-16-5p	mmu-let-7g-5p	mmu-miR-26a-5p	mmu-miR-9-3p	mmu-let-7f-5p	mmu-miR-10a-5p	mmu-miR-181a-5p	mmu-let-7i-5p	mmu-miR-9-5p
	P0	hindbrain	1	mmu-miR-16-5p	mmu-miR-99a-5p	mmu-miR-9-3p	mmu-miR-26a-5p	mmu-miR-9-5p	mmu-let-7g-5p	mmu-miR-181a-5p	mmu-miR-124-3p	mmu-let-7f-5p	mmu-miR-487b-3p
	P0	hindbrain	2	mmu-miR-16-5p	mmu-miR-99a-5p	mmu-miR-9-3p	mmu-miR-26a-5p	mmu-let-7g-5p	mmu-miR-9-5p	mmu-let-7f-5p	mmu-miR-124-3p	mmu-miR-181a-5p	mmu-miR-487b-3p
	e10.5	cranioface	1	mmu-miR-16-5p	mmu-miR-335-5p	mmu-miR-26a-5p	mmu-miR-99a-5p	mmu-miR-17-5p	mmu-miR-20a-5p	mmu-miR-322-5p	mmu-miR-126a-3p	mmu-miR-199a-3p	mmu-miR-199b-3p
	e10.5	cranioface	2	mmu-miR-16-5p	mmu-miR-335-5p	mmu-miR-26a-5p	mmu-miR-99a-5p	mmu-miR-17-5p	mmu-miR-20a-5p	mmu-miR-126a-3p	mmu-miR-322-5p	mmu-miR-99b-5p	mmu-miR-130a-3p
	e11.5	cranioface	1	mmu-miR-16-5p	mmu-miR-335-5p	mmu-miR-26a-5p	mmu-miR-99a-5p	mmu-miR-199a-3p	mmu-miR-199b-3p	mmu-miR-126a-3p	mmu-miR-322-5p	mmu-miR-181b-5p	mmu-miR-99b-5p
	e11.5	cranioface	2	mmu-miR-16-5p	mmu-miR-335-5p	mmu-miR-26a-5p	mmu-miR-99a-5p	mmu-miR-199a-3p	mmu-miR-199b-3p	mmu-miR-126a-3p	mmu-miR-322-5p	mmu-miR-99b-5p	mmu-miR-181b-5p
	e12.5	cranioface	1	mmu-miR-16-5p	mmu-miR-26a-5p	mmu-miR-335-5p	mmu-miR-99a-5p	mmu-miR-199a-3p	mmu-miR-199b-3p	mmu-let-7i-5p	mmu-let-7a-5p	mmu-let-7g-5p	mmu-miR-322-5p
	e12.5	cranioface	2	mmu-miR-16-5p	mmu-miR-26a-5p	mmu-miR-335-5p	mmu-miR-199a-3p	mmu-miR-199b-3p	mmu-miR-99a-5p	mmu-miR-322-5p	mmu-let-7i-5p	mmu-let-7g-5p	mmu-miR-181b-5p
	e13.5	cranioface	1	mmu-miR-16-5p	mmu-miR-26a-5p	mmu-let-7i-5p	mmu-miR-199a-3p	mmu-miR-199b-3p	mmu-let-7g-5p	mmu-let-7f-5p	mmu-miR-99a-5p	mmu-let-7a-5p	mmu-miR-335-5p
	e13.5	cranioface	2	mmu-miR-16-5p	mmu-miR-26a-5p	mmu-miR-199a-3p	mmu-miR-199b-3p	mmu-miR-99a-5p	mmu-let-7i-5p	mmu-let-7g-5p	mmu-let-7f-5p	mmu-miR-322-5p	mmu-let-7a-5p
	e14.5	cranioface	1	mmu-miR-16-5p	mmu-let-7i-5p	mmu-miR-26a-5p	mmu-miR-199a-3p	mmu-miR-199b-3p	mmu-miR-99a-5p	mmu-let-7f-5p	mmu-let-7g-5p	mmu-miR-335-5p	mmu-miR-126a-3p
	e14.5	cranioface	2	mmu-miR-16-5p	mmu-let-7i-5p	mmu-miR-26a-5p	mmu-miR-99a-5p	mmu-let-7f-5p	mmu-miR-126a-3p	mmu-let-7g-5p	mmu-miR-199a-3p	mmu-miR-199b-3p	mmu-miR-203-3p
	e15.5	cranioface	1	mmu-miR-16-5p	mmu-miR-26a-5p	mmu-miR-203-3p	mmu-let-7f-5p	mmu-let-7i-5p	mmu-let-7g-5p	mmu-let-7a-5p	mmu-miR-199a-3p	mmu-miR-199b-3p	mmu-miR-99a-5p
	e15.5	cranioface	2	mmu-miR-16-5p	mmu-miR-26a-5p	mmu-let-7i-5p	mmu-let-7f-5p	mmu-miR-203-3p	mmu-miR-99a-5p	mmu-let-7a-5p	mmu-let-7g-5p	mmu-miR-199a-3p	mmu-miR-199b-3p
	e11.5	neural.tube	1	mmu-miR-16-5p	mmu-miR-10a-5p	mmu-miR-10b-5p	mmu-miR-99a-5p	mmu-miR-335-5p	mmu-miR-181b-5p	mmu-miR-26a-5p	mmu-miR-100-5p	mmu-miR-9-5p	mmu-miR-181a-5p
	e11.5	neural.tube	2	mmu-miR-16-5p	mmu-miR-10a-5p	mmu-miR-10b-5p	mmu-miR-99a-5p	mmu-miR-335-5p	mmu-miR-100-5p	mmu-miR-181b-5p	mmu-miR-26a-5p	mmu-miR-9-5p	mmu-miR-181a-5p
	e12.5	neural.tube	1	mmu-miR-10a-5p	mmu-miR-16-5p	mmu-miR-10b-5p	mmu-miR-99a-5p	mmu-miR-26a-5p	mmu-miR-100-5p	mmu-miR-9-5p	mmu-miR-181a-5p	mmu-miR-9-3p	mmu-miR-335-5p
	e12.5	neural.tube	2	mmu-miR-16-5p	mmu-miR-10a-5p	mmu-miR-10b-5p	mmu-miR-99a-5p	mmu-miR-26a-5p	mmu-miR-100-5p	mmu-miR-9-5p	mmu-miR-181a-5p	mmu-miR-9-3p	mmu-miR-335-5p
	e13.5	neural.tube	1	mmu-miR-10a-5p	mmu-miR-10b-5p	mmu-miR-16-5p	mmu-miR-99a-5p	mmu-miR-181a-5p	mmu-miR-26a-5p	mmu-miR-100-5p	mmu-miR-9-5p	mmu-miR-9-3p	mmu-let-7g-5p
	e13.5	neural.tube	2	mmu-miR-10a-5p	mmu-miR-16-5p	mmu-miR-10b-5p	mmu-miR-99a-5p	mmu-miR-26a-5p	mmu-miR-181a-5p	mmu-miR-9-5p	mmu-miR-100-5p	mmu-miR-9-3p	mmu-let-7g-5p
	e14.5	neural.tube	1	mmu-miR-10b-5p	mmu-miR-10a-5p	mmu-miR-99a-5p	mmu-miR-16-5p	mmu-miR-9-3p	mmu-miR-181a-5p	mmu-miR-9-5p	mmu-miR-26a-5p	mmu-let-7g-5p	mmu-miR-100-5p
	e14.5	neural.tube	2	mmu-miR-10b-5p	mmu-miR-10a-5p	mmu-miR-99a-5p	mmu-miR-16-5p	mmu-miR-9-3p	mmu-miR-181a-5p	mmu-miR-9-5p	mmu-miR-26a-5p	mmu-miR-100-5p	mmu-let-7g-5p
	e15.5	neural.tube	1	mmu-miR-10a-5p	mmu-miR-10b-5p	mmu-miR-99a-5p	mmu-miR-16-5p	mmu-miR-26a-5p	mmu-miR-181a-5p	mmu-let-7g-5p	mmu-let-7i-5p	mmu-let-7f-5p	mmu-miR-9-3p
	e15.5	neural.tube	2	mmu-miR-10a-5p	mmu-miR-10b-5p	mmu-miR-99a-5p	mmu-miR-16-5p	mmu-miR-26a-5p	mmu-miR-181a-5p	mmu-miR-9-3p	mmu-let-7g-5p	mmu-let-7i-5p	mmu-let-7f-5p
	P0	neural.tube	1	mmu-miR-10b-5p	mmu-miR-10a-5p	mmu-miR-16-5p	mmu-miR-99a-5p	mmu-miR-9-3p	mmu-miR-9-5p	mmu-miR-26a-5p	mmu-miR-181a-5p	mmu-miR-124-3p	mmu-let-7g-5p
	P0	neural.tube	2	mmu-miR-10b-5p	mmu-miR-10a-5p	mmu-miR-16-5p	mmu-miR-99a-5p	mmu-miR-9-3p	mmu-miR-26a-5p	mmu-miR-9-5p	mmu-miR-181a-5p	mmu-let-7g-5p	mmu-let-7f-5p
	e11.5	liver	1	mmu-miR-16-5p	mmu-miR-335-5p	mmu-miR-126a-3p	mmu-miR-142a-3p	mmu-miR-26a-5p	mmu-let-7g-5p	mmu-miR-122-5p	mmu-miR-322-5p	mmu-miR-20a-5p	mmu-miR-541-5p
	e11.5	liver	2	mmu-miR-16-5p	mmu-miR-126a-3p	mmu-miR-335-5p	mmu-miR-26a-5p	mmu-miR-142a-3p	mmu-miR-122-5p	mmu-miR-322-5p	mmu-miR-99a-5p	mmu-let-7g-5p	mmu-miR-143-3p
	e12.5	liver	1	mmu-miR-16-5p	mmu-miR-26a-5p	mmu-miR-126a-3p	mmu-miR-122-5p	mmu-miR-335-5p	mmu-miR-142a-3p	mmu-let-7f-5p	mmu-let-7g-5p	mmu-let-7a-5p	mmu-miR-322-5p
	e12.5	liver	2	mmu-miR-16-5p	mmu-miR-26a-5p	mmu-miR-126a-3p	mmu-miR-122-5p	mmu-miR-335-5p	mmu-miR-142a-3p	mmu-let-7g-5p	mmu-miR-322-5p	mmu-let-7f-5p	mmu-miR-99a-5p
	e13.5	liver	1	mmu-miR-16-5p	mmu-miR-122-5p	mmu-miR-26a-5p	mmu-let-7g-5p	mmu-let-7f-5p	mmu-miR-142a-3p	mmu-miR-126a-3p	mmu-miR-335-5p	mmu-let-7a-5p	mmu-miR-322-5p
	e13.5	liver	2	mmu-miR-16-5p	mmu-miR-122-5p	mmu-miR-26a-5p	mmu-let-7g-5p	mmu-let-7f-5p	mmu-miR-142a-3p	mmu-miR-126a-3p	mmu-let-7a-5p	mmu-miR-335-5p	mmu-miR-322-5p
	e14.5	liver	1	mmu-miR-16-5p	mmu-miR-122-5p	mmu-miR-26a-5p	mmu-miR-142a-3p	mmu-miR-126a-3p	mmu-let-7g-5p	mmu-let-7f-5p	mmu-miR-335-5p	mmu-let-7a-5p	mmu-let-7i-5p
	e14.5	liver	2	mmu-miR-16-5p	mmu-miR-122-5p	mmu-miR-26a-5p	mmu-miR-142a-3p	mmu-miR-126a-3p	mmu-let-7f-5p	mmu-let-7g-5p	mmu-miR-335-5p	mmu-let-7a-5p	mmu-miR-411-5p
	e15.5	liver	1	mmu-miR-16-5p	mmu-miR-122-5p	mmu-miR-26a-5p	mmu-let-7f-5p	mmu-let-7g-5p	mmu-let-7a-5p	mmu-miR-142a-3p	mmu-miR-126a-3p	mmu-miR-335-5p	mmu-let-7i-5p
	e15.5	liver	2	mmu-miR-16-5p	mmu-miR-122-5p	mmu-miR-26a-5p	mmu-let-7g-5p	mmu-let-7f-5p	mmu-let-7a-5p	mmu-miR-142a-3p	mmu-miR-335-5p	mmu-miR-126a-3p	mmu-let-7i-5p
	e16.5	liver	1	mmu-miR-16-5p	mmu-miR-122-5p	mmu-miR-26a-5p	mmu-let-7g-5p	mmu-let-7f-5p	mmu-let-7a-5p	mmu-miR-126a-3p	mmu-miR-142a-3p	mmu-let-7i-5p	mmu-miR-335-5p
	e16.5	liver	2	mmu-miR-16-5p	mmu-miR-122-5p	mmu-miR-26a-5p	mmu-let-7f-5p	mmu-let-7g-5p	mmu-let-7a-5p	mmu-miR-126a-3p	mmu-miR-142a-3p	mmu-let-7i-5p	mmu-miR-335-5p
	P0	liver	1	mmu-miR-122-5p	mmu-miR-16-5p	mmu-miR-26a-5p	mmu-let-7g-5p	mmu-miR-126a-3p	mmu-let-7f-5p	mmu-miR-22-3p	mmu-miR-194-5p	mmu-let-7a-5p	mmu-miR-335-5p
	P0	liver	2	mmu-miR-122-5p	mmu-miR-16-5p	mmu-miR-26a-5p	mmu-miR-126a-3p	mmu-let-7g-5p	mmu-let-7f-5p	mmu-miR-22-3p	mmu-miR-194-5p	mmu-let-7a-5p	mmu-miR-335-5p
	e10.5	heart	1	mmu-miR-16-5p	mmu-miR-335-5p	mmu-miR-1a-3p	mmu-miR-143-3p	mmu-miR-26a-5p	mmu-miR-322-5p	mmu-miR-126a-3p	mmu-miR-99a-5p	mmu-miR-208b-3p	mmu-miR-99b-5p
	e10.5	heart	2	mmu-miR-16-5p	mmu-miR-335-5p	mmu-miR-1a-3p	mmu-miR-143-3p	mmu-miR-26a-5p	mmu-miR-322-5p	mmu-miR-208b-3p	mmu-miR-126a-3p	mmu-miR-99a-5p	mmu-miR-351-5p
	e11.5	heart	1	mmu-miR-16-5p	mmu-miR-1a-3p	mmu-miR-335-5p	mmu-miR-143-3p	mmu-miR-322-5p	mmu-miR-126a-3p	mmu-miR-26a-5p	mmu-miR-99a-5p	mmu-miR-208b-3p	mmu-let-7g-5p
	e11.5	heart	2	mmu-miR-16-5p	mmu-miR-1a-3p	mmu-miR-335-5p	mmu-miR-143-3p	mmu-miR-126a-3p	mmu-miR-322-5p	mmu-miR-208b-3p	mmu-miR-26a-5p	mmu-miR-99a-5p	mmu-let-7g-5p
	e12.5	heart	1	mmu-miR-16-5p	mmu-miR-1a-3p	mmu-miR-335-5p	mmu-miR-143-3p	mmu-miR-322-5p	mmu-miR-26a-5p	mmu-miR-99a-5p	mmu-miR-208b-3p	mmu-miR-126a-3p	mmu-let-7g-5p
	e12.5	heart	2	mmu-miR-16-5p	mmu-miR-1a-3p	mmu-miR-335-5p	mmu-miR-143-3p	mmu-miR-322-5p	mmu-miR-26a-5p	mmu-miR-99a-5p	mmu-miR-208b-3p	mmu-miR-126a-3p	mmu-miR-351-5p
	e13.5	heart	1	mmu-miR-1a-3p	mmu-miR-16-5p	mmu-miR-335-5p	mmu-miR-143-3p	mmu-miR-26a-5p	mmu-miR-322-5p	mmu-miR-99a-5p	mmu-miR-126a-3p	mmu-let-7i-5p	mmu-let-7g-5p
	e13.5	heart	2	mmu-miR-1a-3p	mmu-miR-16-5p	mmu-miR-335-5p	mmu-miR-143-3p	mmu-miR-322-5p	mmu-miR-26a-5p	mmu-miR-99a-5p	mmu-miR-126a-3p	mmu-miR-208b-3p	mmu-let-7g-5p
	e14.5	heart	1	mmu-miR-1a-3p	mmu-miR-16-5p	mmu-miR-335-5p	mmu-miR-26a-5p	mmu-miR-208b-3p	mmu-miR-322-5p	mmu-miR-143-3p	mmu-let-7f-5p	mmu-let-7g-5p	mmu-miR-99a-5p
	e14.5	heart	2	mmu-miR-1a-3p	mmu-miR-16-5p	mmu-miR-335-5p	mmu-miR-26a-5p	mmu-miR-143-3p	mmu-miR-208b-3p	mmu-miR-322-5p	mmu-miR-99a-5p	mmu-miR-126a-3p	mmu-let-7g-5p
	e15.5	heart	1	mmu-miR-1a-3p	mmu-miR-16-5p	mmu-miR-335-5p	mmu-miR-26a-5p	mmu-miR-322-5p	mmu-miR-143-3p	mmu-let-7i-5p	mmu-let-7g-5p	mmu-let-7f-5p	mmu-miR-208b-3p
	e15.5	heart	2	mmu-miR-1a-3p	mmu-miR-16-5p	mmu-miR-335-5p	mmu-miR-143-3p	mmu-miR-26a-5p	mmu-let-7f-5p	mmu-miR-322-5p	mmu-let-7i-5p	mmu-let-7g-5p	mmu-miR-99a-5p
	e16.5	heart	1	mmu-miR-1a-3p	mmu-miR-16-5p	mmu-miR-26a-5p	mmu-miR-143-3p	mmu-miR-322-5p	mmu-let-7f-5p	mmu-miR-208b-3p	mmu-miR-126a-3p	mmu-let-7i-5p	mmu-miR-335-5p
	e16.5	heart	2	mmu-miR-1a-3p	mmu-miR-16-5p	mmu-miR-26a-5p	mmu-miR-143-3p	mmu-miR-335-5p	mmu-let-7i-5p	mmu-let-7f-5p	mmu-miR-322-5p	mmu-miR-208b-3p	mmu-miR-126a-3p
	P0	heart	1	mmu-miR-1a-3p	mmu-miR-16-5p	mmu-miR-26a-5p	mmu-miR-143-3p	mmu-miR-208b-3p	mmu-miR-335-5p	mmu-miR-126a-3p	mmu-miR-99a-5p	mmu-let-7g-5p	mmu-let-7f-5p
	P0	heart	2	mmu-miR-1a-3p	mmu-miR-16-5p	mmu-miR-26a-5p	mmu-miR-143-3p	mmu-miR-335-5p	mmu-miR-208b-3p	mmu-miR-126a-3p	mmu-miR-99a-5p	mmu-let-7g-5p	mmu-let-7f-5p
	e10.5	limb	1	mmu-miR-16-5p	mmu-miR-335-5p	mmu-miR-10b-5p	mmu-miR-26a-5p	mmu-miR-10a-5p	mmu-miR-196b-5p	mmu-miR-322-5p	mmu-miR-17-5p	mmu-miR-20a-5p	mmu-miR-126a-3p
	e10.5	limb	2	mmu-miR-16-5p	mmu-miR-335-5p	mmu-miR-322-5p	mmu-miR-196b-5p	mmu-miR-10b-5p	mmu-miR-26a-5p	mmu-miR-10a-5p	mmu-miR-199a-3p	mmu-miR-199b-3p	mmu-miR-17-5p
	e11.5	limb	1	mmu-miR-16-5p	mmu-miR-335-5p	mmu-miR-322-5p	mmu-miR-199a-3p	mmu-miR-199b-3p	mmu-miR-196b-5p	mmu-miR-26a-5p	mmu-miR-10b-5p	mmu-miR-181b-5p	mmu-miR-214-3p
	e11.5	limb	2	mmu-miR-16-5p	mmu-miR-335-5p	mmu-miR-322-5p	mmu-miR-199a-3p	mmu-miR-199b-3p	mmu-miR-196b-5p	mmu-miR-26a-5p	mmu-miR-10b-5p	mmu-miR-99a-5p	mmu-miR-181b-5p
	e12.5	limb	1	mmu-miR-16-5p	mmu-miR-26a-5p	mmu-miR-335-5p	mmu-miR-322-5p	mmu-miR-199a-3p	mmu-miR-199b-3p	mmu-miR-196b-5p	mmu-miR-99a-5p	mmu-miR-181b-5p	mmu-miR-214-3p
	e12.5	limb	2	mmu-miR-16-5p	mmu-miR-26a-5p	mmu-miR-322-5p	mmu-miR-335-5p	mmu-miR-199a-3p	mmu-miR-199b-3p	mmu-miR-196b-5p	mmu-miR-214-3p	mmu-miR-99a-5p	mmu-let-7a-5p
	e13.5	limb	1	mmu-miR-16-5p	mmu-miR-26a-5p	mmu-miR-199a-3p	mmu-miR-199b-3p	mmu-miR-322-5p	mmu-miR-335-5p	mmu-miR-99a-5p	mmu-miR-196b-5p	mmu-let-7g-5p	mmu-let-7f-5p
	e13.5	limb	2	mmu-miR-16-5p	mmu-miR-199a-3p	mmu-miR-199b-3p	mmu-miR-26a-5p	mmu-miR-322-5p	mmu-miR-335-5p	mmu-miR-99a-5p	mmu-let-7g-5p	mmu-miR-196b-5p	mmu-let-7f-5p
	e14.5	limb	1	mmu-miR-16-5p	mmu-miR-26a-5p	mmu-miR-199a-3p	mmu-miR-199b-3p	mmu-miR-335-5p	mmu-miR-322-5p	mmu-let-7f-5p	mmu-miR-203-3p	mmu-miR-99a-5p	mmu-let-7g-5p
	e14.5	limb	2	mmu-miR-16-5p	mmu-miR-26a-5p	mmu-miR-199a-3p	mmu-miR-199b-3p	mmu-miR-335-5p	mmu-miR-322-5p	mmu-let-7f-5p	mmu-miR-181a-5p	mmu-miR-99a-5p	mmu-let-7g-5p
	e15.5	limb	1	mmu-miR-16-5p	mmu-miR-26a-5p	mmu-let-7f-5p	mmu-miR-203-3p	mmu-let-7i-5p	mmu-miR-199a-3p	mmu-miR-199b-3p	mmu-miR-335-5p	mmu-let-7a-5p	mmu-let-7g-5p
	e15.5	limb	2	mmu-miR-16-5p	mmu-miR-26a-5p	mmu-miR-203-3p	mmu-let-7f-5p	mmu-miR-199a-3p	mmu-miR-199b-3p	mmu-let-7i-5p	mmu-let-7g-5p	mmu-let-7a-5p	mmu-miR-335-5p
	e14.5	stomach	1	mmu-miR-16-5p	mmu-miR-143-3p	mmu-miR-26a-5p	mmu-miR-99a-5p	mmu-let-7f-5p	mmu-miR-335-5p	mmu-let-7g-5p	mmu-miR-10a-5p	mmu-let-7a-5p	mmu-let-7i-5p
	e14.5	stomach	2	mmu-miR-16-5p	mmu-miR-143-3p	mmu-miR-26a-5p	mmu-miR-99a-5p	mmu-let-7f-5p	mmu-miR-335-5p	mmu-let-7g-5p	mmu-miR-10a-5p	mmu-let-7a-5p	mmu-let-7i-5p
	e15.5	stomach	1	mmu-miR-143-3p	mmu-miR-16-5p	mmu-miR-26a-5p	mmu-let-7f-5p	mmu-let-7g-5p	mmu-let-7i-5p	mmu-miR-99a-5p	mmu-miR-335-5p	mmu-miR-10a-5p	mmu-let-7a-5p
	e15.5	stomach	2	mmu-miR-143-3p	mmu-miR-16-5p	mmu-miR-26a-5p	mmu-let-7f-5p	mmu-let-7g-5p	mmu-let-7i-5p	mmu-miR-99a-5p	mmu-miR-335-5p	mmu-let-7a-5p	mmu-miR-10a-5p
	e16.5	stomach	1	mmu-miR-143-3p	mmu-miR-16-5p	mmu-miR-26a-5p	mmu-let-7f-5p	mmu-miR-99a-5p	mmu-let-7i-5p	mmu-let-7g-5p	mmu-miR-335-5p	mmu-let-7a-5p	mmu-miR-10a-5p
	e16.5	stomach	2	mmu-miR-143-3p	mmu-miR-16-5p	mmu-miR-26a-5p	mmu-let-7f-5p	mmu-let-7g-5p	mmu-miR-99a-5p	mmu-let-7i-5p	mmu-let-7a-5p	mmu-miR-203-3p	mmu-miR-429-3p
	P0	stomach	1	mmu-miR-143-3p	mmu-miR-16-5p	mmu-miR-203-3p	mmu-miR-26a-5p	mmu-let-7f-5p	mmu-miR-99a-5p	mmu-let-7g-5p	mmu-miR-429-3p	mmu-let-7i-5p	mmu-miR-126a-3p
	P0	stomach	2	mmu-miR-143-3p	mmu-miR-16-5p	mmu-miR-203-3p	mmu-miR-26a-5p	mmu-let-7f-5p	mmu-miR-99a-5p	mmu-let-7g-5p	mmu-miR-429-3p	mmu-let-7i-5p	mmu-miR-126a-3p
	e14.5	intestine	1	mmu-miR-16-5p	mmu-miR-143-3p	mmu-miR-26a-5p	mmu-miR-10a-5p	mmu-miR-335-5p	mmu-let-7f-5p	mmu-let-7g-5p	mmu-miR-10b-5p	mmu-miR-99a-5p	mmu-let-7i-5p
	e14.5	intestine	2	mmu-miR-16-5p	mmu-miR-143-3p	mmu-miR-26a-5p	mmu-miR-10a-5p	mmu-miR-335-5p	mmu-let-7f-5p	mmu-let-7g-5p	mmu-miR-10b-5p	mmu-let-7i-5p	mmu-miR-99a-5p
	e16.5	intestine	1	mmu-miR-143-3p	mmu-miR-16-5p	mmu-miR-26a-5p	mmu-let-7f-5p	mmu-let-7g-5p	mmu-let-7i-5p	mmu-miR-10a-5p	mmu-let-7a-5p	mmu-miR-335-5p	mmu-miR-429-3p
	e16.5	intestine	2	mmu-miR-143-3p	mmu-miR-16-5p	mmu-let-7f-5p	mmu-miR-26a-5p	mmu-let-7g-5p	mmu-let-7i-5p	mmu-miR-10a-5p	mmu-let-7a-5p	mmu-miR-335-5p	mmu-miR-429-3p
	P0	intestine	1	mmu-miR-16-5p	mmu-miR-143-3p	mmu-miR-194-5p	mmu-miR-26a-5p	mmu-let-7f-5p	mmu-let-7g-5p	mmu-miR-126a-3p	mmu-miR-429-3p	mmu-let-7i-5p	mmu-miR-200c-3p
	P0	intestine	2	mmu-miR-16-5p	mmu-miR-143-3p	mmu-miR-194-5p	mmu-miR-26a-5p	mmu-let-7f-5p	mmu-let-7g-5p	mmu-miR-429-3p	mmu-miR-126a-3p	mmu-let-7i-5p	mmu-miR-200c-3p
	e14.5	kidney	1	mmu-miR-16-5p	mmu-miR-10a-5p	mmu-miR-26a-5p	mmu-miR-335-5p	mmu-miR-10b-5p	mmu-let-7f-5p	mmu-let-7i-5p	mmu-let-7g-5p	mmu-let-7a-5p	mmu-miR-126a-3p
	e14.5	kidney	2	mmu-miR-16-5p	mmu-miR-10a-5p	mmu-miR-335-5p	mmu-miR-26a-5p	mmu-miR-10b-5p	mmu-let-7i-5p	mmu-let-7f-5p	mmu-miR-126a-3p	mmu-let-7g-5p	mmu-miR-99a-5p
	e15.5	kidney	1	mmu-miR-16-5p	mmu-miR-10a-5p	mmu-miR-26a-5p	mmu-let-7f-5p	mmu-let-7g-5p	mmu-miR-335-5p	mmu-miR-10b-5p	mmu-let-7i-5p	mmu-miR-322-5p	mmu-let-7a-5p
	e15.5	kidney	2	mmu-miR-16-5p	mmu-miR-10a-5p	mmu-miR-26a-5p	mmu-let-7f-5p	mmu-let-7i-5p	mmu-let-7g-5p	mmu-miR-335-5p	mmu-let-7a-5p	mmu-miR-10b-5p	mmu-miR-322-5p
	e16.5	kidney	1	mmu-miR-16-5p	mmu-miR-10a-5p	mmu-miR-26a-5p	mmu-let-7f-5p	mmu-let-7g-5p	mmu-let-7i-5p	mmu-miR-335-5p	mmu-miR-10b-5p	mmu-let-7a-5p	mmu-miR-322-5p
	e16.5	kidney	2	mmu-miR-10a-5p	mmu-miR-16-5p	mmu-miR-26a-5p	mmu-let-7f-5p	mmu-let-7g-5p	mmu-let-7i-5p	mmu-miR-335-5p	mmu-miR-10b-5p	mmu-let-7a-5p	mmu-miR-322-5p
	P0	kidney	1	mmu-miR-16-5p	mmu-miR-10a-5p	mmu-miR-26a-5p	mmu-let-7f-5p	mmu-miR-10b-5p	mmu-let-7g-5p	mmu-miR-335-5p	mmu-miR-126a-3p	mmu-miR-322-5p	mmu-let-7i-5p
	P0	kidney	2	mmu-miR-16-5p	mmu-miR-10a-5p	mmu-miR-26a-5p	mmu-let-7f-5p	mmu-miR-126a-3p	mmu-miR-10b-5p	mmu-let-7g-5p	mmu-miR-335-5p	mmu-let-7i-5p	mmu-miR-322-5p
	e14.5	lung	1	mmu-miR-16-5p	mmu-miR-26a-5p	mmu-let-7f-5p	mmu-miR-143-3p	mmu-miR-335-5p	mmu-let-7g-5p	mmu-miR-126a-3p	mmu-let-7i-5p	mmu-miR-322-5p	mmu-miR-99a-5p
	e14.5	lung	2	mmu-miR-16-5p	mmu-miR-26a-5p	mmu-let-7f-5p	mmu-miR-335-5p	mmu-let-7g-5p	mmu-miR-143-3p	mmu-miR-322-5p	mmu-let-7i-5p	mmu-miR-10a-5p	mmu-miR-126a-3p
	e15.5	lung	1	mmu-miR-16-5p	mmu-let-7f-5p	mmu-miR-26a-5p	mmu-miR-322-5p	mmu-let-7g-5p	mmu-let-7i-5p	mmu-miR-143-3p	mmu-let-7a-5p	mmu-miR-126a-3p	mmu-miR-335-5p
	e15.5	lung	2	mmu-miR-16-5p	mmu-let-7f-5p	mmu-miR-26a-5p	mmu-let-7g-5p	mmu-let-7i-5p	mmu-miR-322-5p	mmu-miR-143-3p	mmu-let-7a-5p	mmu-miR-126a-3p	mmu-miR-335-5p
	e16.5	lung	1	mmu-miR-16-5p	mmu-let-7f-5p	mmu-miR-26a-5p	mmu-miR-322-5p	mmu-let-7i-5p	mmu-let-7g-5p	mmu-miR-126a-3p	mmu-miR-143-3p	mmu-let-7a-5p	mmu-miR-335-5p
	e16.5	lung	2	mmu-miR-16-5p	mmu-let-7f-5p	mmu-miR-26a-5p	mmu-miR-322-5p	mmu-let-7g-5p	mmu-let-7i-5p	mmu-miR-143-3p	mmu-miR-126a-3p	mmu-let-7a-5p	mmu-miR-335-5p
	P0	lung	1	mmu-miR-16-5p	mmu-miR-26a-5p	mmu-miR-322-5p	mmu-miR-126a-3p	mmu-let-7f-5p	mmu-miR-335-5p	mmu-miR-143-3p	mmu-let-7g-5p	mmu-miR-181a-5p	mmu-let-7i-5p
	P0	lung	2	mmu-miR-16-5p	mmu-miR-26a-5p	mmu-miR-322-5p	mmu-let-7f-5p	mmu-miR-126a-3p	mmu-miR-335-5p	mmu-let-7g-5p	mmu-miR-143-3p	mmu-let-7a-5p	mmu-miR-181a-5p
	P0	skeletal.muscle	1	mmu-miR-1a-3p	mmu-miR-206-3p	mmu-miR-16-5p	mmu-miR-26a-5p	mmu-miR-335-5p	mmu-let-7f-5p	mmu-miR-487b-3p	mmu-miR-431-5p	mmu-miR-381-3p	mmu-let-7i-5p
	P0	skeletal.muscle	2	mmu-miR-1a-3p	mmu-miR-206-3p	mmu-miR-16-5p	mmu-miR-431-5p	mmu-miR-381-3p	mmu-miR-487b-3p	mmu-miR-26a-5p	mmu-let-7f-5p	mmu-miR-335-5p	mmu-miR-127-3p
	P0	thymus	1	mmu-miR-16-5p	mmu-miR-181a-5p	mmu-miR-142a-3p	mmu-miR-26a-5p	mmu-miR-181b-5p	mmu-let-7g-5p	mmu-let-7f-5p	mmu-let-7a-5p	mmu-miR-181a-1-3p	mmu-miR-143-3p
	P0	thymus	2	mmu-miR-16-5p	mmu-miR-181a-5p	mmu-miR-142a-3p	mmu-miR-26a-5p	mmu-miR-181b-5p	mmu-let-7g-5p	mmu-let-7f-5p	mmu-miR-143-3p	mmu-miR-181a-1-3p	mmu-let-7a-5p
	P0	bladder	1	mmu-miR-143-3p	mmu-miR-16-5p	mmu-miR-26a-5p	mmu-let-7f-5p	mmu-miR-99a-5p	mmu-let-7g-5p	mmu-let-7i-5p	mmu-miR-22-3p	mmu-miR-1a-3p	mmu-miR-322-5p
	P0	bladder	2	mmu-miR-143-3p	mmu-miR-16-5p	mmu-miR-26a-5p	mmu-let-7f-5p	mmu-miR-99a-5p	mmu-let-7g-5p	mmu-miR-322-5p	mmu-let-7i-5p	mmu-miR-1a-3p	mmu-miR-22-3p
	P0	adrenals	1	mmu-let-7a-5p	mmu-miR-16-5p	mmu-let-7f-5p	mmu-miR-26a-5p	mmu-let-7c-5p	mmu-miR-10a-5p	mmu-miR-126a-3p	mmu-let-7g-5p	mmu-let-7i-5p	mmu-let-7d-5p
	P0	adrenals	2	mmu-miR-16-5p	mmu-let-7f-5p	mmu-miR-26a-5p	mmu-let-7a-5p	mmu-miR-126a-3p	mmu-miR-10a-5p	mmu-let-7g-5p	mmu-let-7i-5p	mmu-let-7c-5p	mmu-miR-22-3p
