# Supplementary material for: Dynamics of microRNA expression during mouse prenatal development
Source: HighWire-hosted journal article supplement (doi:10.1101/gr.248997.119), 2019-10-23
Supplement: Supplemental_Table_S3.xlsx [file Supplemental_Table_S3.xlsx]

## Sheet: Sheet1
	List of differentially expressed miRNAs in mouse
	miRNA	cluster
	mmu-let-7a-1-3p	1
	mmu-let-7a-5p	1
	mmu-let-7b-3p	1
	mmu-let-7b-5p	1
	mmu-let-7c-2-3p	1
	mmu-let-7d-3p	1
	mmu-let-7d-5p	1
	mmu-let-7e-5p	1
	mmu-let-7f-1-3p	1
	mmu-let-7f-5p	1
	mmu-let-7g-5p	1
	mmu-let-7i-3p	1
	mmu-let-7i-5p	1
	mmu-let-7j	1
	mmu-miR-151-5p	1
	mmu-miR-320-3p	1
	mmu-miR-467e-5p	1
	mmu-miR-669c-5p	1
	mmu-miR-672-5p	1
	mmu-miR-676-3p	1
	mmu-miR-98-5p	1
	mmu-let-7c-1-3p	2
	mmu-let-7c-5p	2
	mmu-miR-103-3p	2
	mmu-miR-12194-3p	2
	mmu-miR-125b-1-3p	2
	mmu-miR-125b-5p	2
	mmu-miR-128-2-5p	2
	mmu-miR-137-5p	2
	mmu-miR-149-5p	2
	mmu-miR-181a-1-3p	2
	mmu-miR-181a-5p	2
	mmu-miR-181b-5p	2
	mmu-miR-181c-3p	2
	mmu-miR-181d-5p	2
	mmu-miR-301a-3p	2
	mmu-miR-3078-5p	2
	mmu-miR-330-3p	2
	mmu-miR-340-3p	2
	mmu-miR-340-5p	2
	mmu-miR-344c-3p	2
	mmu-miR-488-3p	2
	mmu-miR-488-5p	2
	mmu-miR-6977-3p	2
	mmu-miR-701-5p	2
	mmu-miR-708-3p	2
	mmu-miR-708-5p	2
	mmu-miR-7a-5p	2
	mmu-miR-7b-5p	2
	mmu-miR-9-3p	2
	mmu-miR-9-5p	2
	mmu-miR-935	2
	mmu-miR-99a-3p	2
	mmu-miR-99a-5p	2
	mmu-miR-100-3p	3
	mmu-miR-100-5p	3
	mmu-miR-1198-5p	3
	mmu-miR-124-5p	3
	mmu-miR-124b-3p	3
	mmu-miR-1251-3p	3
	mmu-miR-1251-5p	3
	mmu-miR-135a-1-3p	3
	mmu-miR-135a-2-3p	3
	mmu-miR-135b-3p	3
	mmu-miR-135b-5p	3
	mmu-miR-153-5p	3
	mmu-miR-216a-3p	3
	mmu-miR-216a-5p	3
	mmu-miR-216b-3p	3
	mmu-miR-216b-5p	3
	mmu-miR-217-3p	3
	mmu-miR-217-5p	3
	mmu-miR-218-5p	3
	mmu-miR-219a-1-3p	3
	mmu-miR-219a-2-3p	3
	mmu-miR-219a-5p	3
	mmu-miR-301b-3p	3
	mmu-miR-3067-5p	3
	mmu-miR-3074-1-3p	3
	mmu-miR-3081-3p	3
	mmu-miR-3093-3p	3
	mmu-miR-3093-5p	3
	mmu-miR-325-3p	3
	mmu-miR-325-5p	3
	mmu-miR-344e-3p	3
	mmu-miR-505-5p	3
	mmu-miR-598-5p	3
	mmu-miR-670-3p	3
	mmu-miR-670-5p	3
	mmu-miR-760-3p	3
	mmu-miR-872-5p	3
	mmu-miR-877-5p	3
	mmu-miR-92b-3p	3
	mmu-miR-92b-5p	3
	mmu-miR-101a-3p	4
	mmu-miR-101b-3p	4
	mmu-miR-101c	4
	mmu-miR-12191-3p	4
	mmu-miR-122-3p	4
	mmu-miR-122-5p	4
	mmu-miR-126b-3p	4
	mmu-miR-127-3p	4
	mmu-miR-127-5p	4
	mmu-miR-129b-3p	4
	mmu-miR-129b-5p	4
	mmu-miR-136-3p	4
	mmu-miR-136-5p	4
	mmu-miR-142a-3p	4
	mmu-miR-142a-5p	4
	mmu-miR-144-3p	4
	mmu-miR-144-5p	4
	mmu-miR-154-3p	4
	mmu-miR-154-5p	4
	mmu-miR-16-5p	4
	mmu-miR-185-5p	4
	mmu-miR-1968-5p	4
	mmu-miR-1981-5p	4
	mmu-miR-223-3p	4
	mmu-miR-223-5p	4
	mmu-miR-292b-3p	4
	mmu-miR-29a-3p	4
	mmu-miR-29b-3p	4
	mmu-miR-300-3p	4
	mmu-miR-3070-3p	4
	mmu-miR-3098-5p	4
	mmu-miR-329-3p	4
	mmu-miR-3544-3p	4
	mmu-miR-376a-3p	4
	mmu-miR-376a-5p	4
	mmu-miR-376b-3p	4
	mmu-miR-376b-5p	4
	mmu-miR-381-3p	4
	mmu-miR-409-5p	4
	mmu-miR-410-3p	4
	mmu-miR-434-3p	4
	mmu-miR-434-5p	4
	mmu-miR-451a	4
	mmu-miR-486a-3p	4
	mmu-miR-486a-5p	4
	mmu-miR-486b-3p	4
	mmu-miR-486b-5p	4
	mmu-miR-494-3p	4
	mmu-miR-496a-3p	4
	mmu-miR-5104	4
	mmu-miR-5114	4
	mmu-miR-5123	4
	mmu-miR-539-5p	4
	mmu-miR-7670-3p	4
	mmu-miR-106a-5p	5
	mmu-miR-106b-5p	5
	mmu-miR-1197-5p	5
	mmu-miR-125a-3p	5
	mmu-miR-130a-3p	5
	mmu-miR-130b-3p	5
	mmu-miR-155-5p	5
	mmu-miR-17-3p	5
	mmu-miR-17-5p	5
	mmu-miR-181b-2-3p	5
	mmu-miR-181d-3p	5
	mmu-miR-18a-5p	5
	mmu-miR-18b-3p	5
	mmu-miR-18b-5p	5
	mmu-miR-1955-5p	5
	mmu-miR-196b-5p	5
	mmu-miR-1983	5
	mmu-miR-19b-1-5p	5
	mmu-miR-19b-2-5p	5
	mmu-miR-20a-5p	5
	mmu-miR-20b-3p	5
	mmu-miR-20b-5p	5
	mmu-miR-296-3p	5
	mmu-miR-301b-5p	5
	mmu-miR-32-3p	5
	mmu-miR-345-3p	5
	mmu-miR-363-3p	5
	mmu-miR-363-5p	5
	mmu-miR-421-3p	5
	mmu-miR-6399	5
	mmu-miR-674-3p	5
	mmu-miR-674-5p	5
	mmu-miR-758-5p	5
	mmu-miR-7654-3p	5
	mmu-miR-872-3p	5
	mmu-miR-92a-1-5p	5
	mmu-miR-92a-3p	5
	mmu-miR-99b-3p	5
	mmu-miR-99b-5p	5
	mmu-miR-107-3p	6
	mmu-miR-126a-3p	6
	mmu-miR-126a-5p	6
	mmu-miR-139-5p	6
	mmu-miR-148b-5p	6
	mmu-miR-191-5p	6
	mmu-miR-201-5p	6
	mmu-miR-21a-3p	6
	mmu-miR-21a-5p	6
	mmu-miR-22-3p	6
	mmu-miR-22-5p	6
	mmu-miR-221-3p	6
	mmu-miR-222-3p	6
	mmu-miR-3068-5p	6
	mmu-miR-30a-3p	6
	mmu-miR-30a-5p	6
	mmu-miR-30c-2-3p	6
	mmu-miR-30c-5p	6
	mmu-miR-30d-3p	6
	mmu-miR-30d-5p	6
	mmu-miR-30e-3p	6
	mmu-miR-30e-5p	6
	mmu-miR-3105-3p	6
	mmu-miR-3105-5p	6
	mmu-miR-425-5p	6
	mmu-miR-511-3p	6
	mmu-miR-547-3p	6
	mmu-miR-10a-3p	7
	mmu-miR-10a-5p	7
	mmu-miR-10b-3p	7
	mmu-miR-10b-5p	7
	mmu-miR-182-5p	7
	mmu-miR-183-3p	7
	mmu-miR-183-5p	7
	mmu-miR-196a-1-3p	7
	mmu-miR-196a-5p	7
	mmu-miR-211-5p	7
	mmu-miR-615-3p	7
	mmu-miR-615-5p	7
	mmu-miR-741-3p	7
	mmu-miR-96-3p	7
	mmu-miR-96-5p	7
	mmu-miR-1187	8
	mmu-miR-466a-3p	8
	mmu-miR-466b-3p	8
	mmu-miR-466b-5p	8
	mmu-miR-466c-3p	8
	mmu-miR-466e-3p	8
	mmu-miR-466e-5p	8
	mmu-miR-466f	8
	mmu-miR-466f-5p	8
	mmu-miR-466k	8
	mmu-miR-466m-5p	8
	mmu-miR-466o-5p	8
	mmu-miR-466p-3p	8
	mmu-miR-467d-5p	8
	mmu-miR-6539	8
	mmu-miR-669a-5p	8
	mmu-miR-669l-5p	8
	mmu-miR-669m-5p	8
	mmu-miR-669p-5p	8
	mmu-miR-7688-5p	8
	mmu-miR-1193-3p	9
	mmu-miR-1193-5p	9
	mmu-miR-134-5p	9
	mmu-miR-1946b	9
	mmu-miR-299a-3p	9
	mmu-miR-299a-5p	9
	mmu-miR-3072-3p	9
	mmu-miR-337-5p	9
	mmu-miR-341-3p	9
	mmu-miR-341-5p	9
	mmu-miR-369-3p	9
	mmu-miR-376c-3p	9
	mmu-miR-377-5p	9
	mmu-miR-379-3p	9
	mmu-miR-379-5p	9
	mmu-miR-380-3p	9
	mmu-miR-409-3p	9
	mmu-miR-410-5p	9
	mmu-miR-411-3p	9
	mmu-miR-411-5p	9
	mmu-miR-412-5p	9
	mmu-miR-431-5p	9
	mmu-miR-493-3p	9
	mmu-miR-494-5p	9
	mmu-miR-540-3p	9
	mmu-miR-673-5p	9
	mmu-miR-679-3p	9
	mmu-miR-12206-5p	10
	mmu-miR-192-3p	10
	mmu-miR-192-5p	10
	mmu-miR-194-1-3p	10
	mmu-miR-194-2-3p	10
	mmu-miR-194-5p	10
	mmu-miR-203b-3p	10
	mmu-miR-215-3p	10
	mmu-miR-215-5p	10
	mmu-miR-3073b-5p	10
	mmu-miR-30b-5p	10
	mmu-miR-31-3p	10
	mmu-miR-31-5p	10
	mmu-miR-582-5p	10
	mmu-miR-98-3p	10
	mmu-miR-1224-5p	11
	mmu-miR-124-3p	11
	mmu-miR-125b-2-3p	11
	mmu-miR-1264-3p	11
	mmu-miR-1264-5p	11
	mmu-miR-128-3p	11
	mmu-miR-129-1-3p	11
	mmu-miR-129-2-3p	11
	mmu-miR-129-5p	11
	mmu-miR-1298-3p	11
	mmu-miR-1298-5p	11
	mmu-miR-132-3p	11
	mmu-miR-132-5p	11
	mmu-miR-135a-5p	11
	mmu-miR-137-3p	11
	mmu-miR-138-1-3p	11
	mmu-miR-138-2-3p	11
	mmu-miR-138-5p	11
	mmu-miR-139-3p	11
	mmu-miR-146b-3p	11
	mmu-miR-146b-5p	11
	mmu-miR-149-3p	11
	mmu-miR-150-3p	11
	mmu-miR-150-5p	11
	mmu-miR-153-3p	11
	mmu-miR-181c-5p	11
	mmu-miR-1839-3p	11
	mmu-miR-1839-5p	11
	mmu-miR-1843a-5p	11
	mmu-miR-1843b-5p	11
	mmu-miR-186-5p	11
	mmu-miR-187-3p	11
	mmu-miR-1912-3p	11
	mmu-miR-1969	11
	mmu-miR-204-3p	11
	mmu-miR-204-5p	11
	mmu-miR-212-3p	11
	mmu-miR-212-5p	11
	mmu-miR-29b-2-5p	11
	mmu-miR-29c-3p	11
	mmu-miR-300-5p	11
	mmu-miR-3059-3p	11
	mmu-miR-3059-5p	11
	mmu-miR-3061-5p	11
	mmu-miR-3099-3p	11
	mmu-miR-3106-5p	11
	mmu-miR-323-3p	11
	mmu-miR-326-3p	11
	mmu-miR-328-3p	11
	mmu-miR-329-5p	11
	mmu-miR-330-5p	11
	mmu-miR-331-3p	11
	mmu-miR-331-5p	11
	mmu-miR-338-3p	11
	mmu-miR-338-5p	11
	mmu-miR-342-3p	11
	mmu-miR-342-5p	11
	mmu-miR-344-3p	11
	mmu-miR-344b-3p	11
	mmu-miR-344d-3p	11
	mmu-miR-344f-3p	11
	mmu-miR-344f-5p	11
	mmu-miR-346-5p	11
	mmu-miR-3475-3p	11
	mmu-miR-370-3p	11
	mmu-miR-382-5p	11
	mmu-miR-383-3p	11
	mmu-miR-383-5p	11
	mmu-miR-384-3p	11
	mmu-miR-384-5p	11
	mmu-miR-431-3p	11
	mmu-miR-433-3p	11
	mmu-miR-448-3p	11
	mmu-miR-448-5p	11
	mmu-miR-487b-3p	11
	mmu-miR-544-3p	11
	mmu-miR-544-5p	11
	mmu-miR-551b-5p	11
	mmu-miR-592-5p	11
	mmu-miR-598-3p	11
	mmu-miR-6540-3p	11
	mmu-miR-6540-5p	11
	mmu-miR-666-3p	11
	mmu-miR-666-5p	11
	mmu-miR-668-3p	11
	mmu-miR-668-5p	11
	mmu-miR-672-3p	11
	mmu-miR-770-3p	11
	mmu-miR-770-5p	11
	mmu-miR-7a-1-3p	11
	mmu-miR-7a-2-3p	11
	mmu-miR-7b-3p	11
	mmu-miR-873a-3p	11
	mmu-miR-873a-5p	11
	mmu-miR-874-3p	11
	mmu-miR-879-5p	11
	mmu-miR-1231-5p	12
	mmu-miR-133a-3p	12
	mmu-miR-133a-5p	12
	mmu-miR-133b-3p	12
	mmu-miR-151-3p	12
	mmu-miR-188-5p	12
	mmu-miR-190a-5p	12
	mmu-miR-1a-1-5p	12
	mmu-miR-1a-3p	12
	mmu-miR-208a-3p	12
	mmu-miR-208a-5p	12
	mmu-miR-208b-3p	12
	mmu-miR-208b-5p	12
	mmu-miR-30c-1-3p	12
	mmu-miR-3102-5p.2-5p	12
	mmu-miR-322-3p	12
	mmu-miR-322-5p	12
	mmu-miR-335-3p	12
	mmu-miR-335-5p	12
	mmu-miR-351-3p	12
	mmu-miR-351-5p	12
	mmu-miR-362-5p	12
	mmu-miR-378a-3p	12
	mmu-miR-378a-5p	12
	mmu-miR-378b	12
	mmu-miR-378c	12
	mmu-miR-378d	12
	mmu-miR-450a-1-3p	12
	mmu-miR-450a-2-3p	12
	mmu-miR-450a-5p	12
	mmu-miR-450b-3p	12
	mmu-miR-450b-5p	12
	mmu-miR-483-3p	12
	mmu-miR-483-5p	12
	mmu-miR-499-3p	12
	mmu-miR-499-5p	12
	mmu-miR-500-3p	12
	mmu-miR-501-3p	12
	mmu-miR-501-5p	12
	mmu-miR-503-3p	12
	mmu-miR-503-5p	12
	mmu-miR-504-5p	12
	mmu-miR-532-3p	12
	mmu-miR-532-5p	12
	mmu-miR-542-3p	12
	mmu-miR-542-5p	12
	mmu-miR-6353	12
	mmu-miR-652-3p	12
	mmu-miR-675-3p	12
	mmu-miR-675-5p	12
	mmu-miR-676-5p	12
	mmu-miR-700-3p	12
	mmu-miR-7083-5p	12
	mmu-miR-7689-3p	12
	mmu-miR-133b-5p	13
	mmu-miR-140-3p	13
	mmu-miR-140-5p	13
	mmu-miR-199a-3p	13
	mmu-miR-199a-5p	13
	mmu-miR-199b-3p	13
	mmu-miR-199b-5p	13
	mmu-miR-206-3p	13
	mmu-miR-214-3p	13
	mmu-miR-214-5p	13
	mmu-miR-3095-3p	13
	mmu-miR-452-3p	13
	mmu-miR-652-5p	13
	mmu-miR-141-3p	14
	mmu-miR-141-5p	14
	mmu-miR-143-3p	14
	mmu-miR-143-5p	14
	mmu-miR-145a-3p	14
	mmu-miR-145a-5p	14
	mmu-miR-145b	14
	mmu-miR-147-3p	14
	mmu-miR-148a-3p	14
	mmu-miR-148a-5p	14
	mmu-miR-152-3p	14
	mmu-miR-193a-5p	14
	mmu-miR-200a-3p	14
	mmu-miR-200a-5p	14
	mmu-miR-200b-3p	14
	mmu-miR-200b-5p	14
	mmu-miR-200c-3p	14
	mmu-miR-200c-5p	14
	mmu-miR-203-3p	14
	mmu-miR-203-5p	14
	mmu-miR-205-3p	14
	mmu-miR-205-5p	14
	mmu-miR-210-3p	14
	mmu-miR-210-5p	14
	mmu-miR-224-5p	14
	mmu-miR-23a-3p	14
	mmu-miR-23a-5p	14
	mmu-miR-23b-3p	14
	mmu-miR-24-1-5p	14
	mmu-miR-24-2-5p	14
	mmu-miR-24-3p	14
	mmu-miR-26a-1-3p	14
	mmu-miR-26a-2-3p	14
	mmu-miR-26a-5p	14
	mmu-miR-26b-3p	14
	mmu-miR-26b-5p	14
	mmu-miR-27a-3p	14
	mmu-miR-27a-5p	14
	mmu-miR-27b-3p	14
	mmu-miR-27b-5p	14
	mmu-miR-28a-3p	14
	mmu-miR-28a-5p	14
	mmu-miR-34a-5p	14
	mmu-miR-365-3p	14
	mmu-miR-375-3p	14
	mmu-miR-429-3p	14
	mmu-miR-455-3p	14
	mmu-miR-455-5p	14
	mmu-miR-490-3p	14
	mmu-miR-490-5p	14
	mmu-miR-574-3p	14
	mmu-miR-574-5p	14
	mmu-miR-802-3p	14
	mmu-miR-802-5p	14
	mmu-miR-146a-5p	15
	mmu-miR-195a-3p	15
	mmu-miR-195a-5p	15
	mmu-miR-34b-3p	15
	mmu-miR-34b-5p	15
	mmu-miR-34c-3p	15
	mmu-miR-34c-5p	15
	mmu-miR-449a-5p	15
	mmu-miR-449c-5p	15
	mmu-miR-497a-5p	15
	mmu-miR-291a-3p	16
	mmu-miR-291a-5p	16
	mmu-miR-291b-3p	16
	mmu-miR-291b-5p	16
	mmu-miR-292a-3p	16
	mmu-miR-292a-5p	16
	mmu-miR-293-3p	16
	mmu-miR-294-3p	16
	mmu-miR-294-5p	16
	mmu-miR-295-3p	16
	mmu-miR-302a-3p	16
	mmu-miR-302a-5p	16
	mmu-miR-302b-3p	16
	mmu-miR-302b-5p	16
	mmu-miR-302c-3p	16
	mmu-miR-302d-3p	16
	mmu-miR-367-3p	16
