# Supplementary material for: Dynamics of microRNA expression during mouse prenatal development
Source: HighWire-hosted journal article supplement (doi:10.1101/gr.248997.119), 2019-10-23
Supplement: Supplemental_Table_S7.xlsx [file Supplemental_Table_S7.xlsx]

## Sheet: Sheet1
	List of a subset of miRNAs and their corresponding correlations with their primary transcripts
	microRNA	Correlation with pri-miRNA
	Mir488	0.961521
	Mir205	0.948327
	Mir135b	0.945039
	Mir670	0.94152
	Mir3099	0.939747
	Mir325	0.938027
	Mir135a-2	0.936045
	Mir1251	0.935679
	Mir1224	0.934772
	Mir204	0.930482
	Mir128-2	0.924128
	Mir214	0.922227
	Mir598	0.919424
	Mir137	0.919168
	Mir125b-1	0.917584
	Mir10b	0.917294
	Mir6540	0.91445
	Mir200b	0.914212
	Mir429	0.914048
	Mir383	0.91125
	Mir483	0.909937
	Mir153	0.907749
	Mir490	0.903542
	Mir200a	0.902167
	Mir675	0.901974
	Mir592	0.898224
	Mir615	0.894875
	Mir503	0.889718
	Mir199a-2	0.887474
	Mir346	0.886609
	Mir19b-1	0.886588
	Mir92b	0.886461
	Mir3093	0.884722
	Mir124a-2	0.884546
	Mir223	0.884081
	Mir100	0.883199
	Mir448	0.882686
	Mir1298	0.881956
	Mir672	0.880079
	Gm23450	0.878384
	Mir18	0.871135
	Mir3078	0.870004
	Mir3059	0.866755
	Mir3475	0.866596
	Mir351	0.863425
	Mir1264	0.862285
	Mir135a-1	0.862151
	Mir206	0.854994
	Mir6944	0.85097
	Mir9-1	0.850863
	Mir879	0.847755
	Mir133b	0.846584
	Mir24-1	0.845472
	Mir873a	0.844336
	Mir322	0.843949
	Mir22	0.841421
	Mir335	0.840673
	Mirlet7c-2	0.840434
	Mir92-1	0.836404
	Mir3067	0.836317
	Mir449a	0.835702
	Mir10a	0.834515
	Mir17	0.830253
	Mir296	0.822523
	Mir211	0.821864
	Mir138-1	0.817174
	Mir708	0.815063
	Mir551b	0.814137
	Mir219a-2	0.813729
	Mir138-2	0.811671
	Mir196b	0.811139
	Mir28a	0.809856
	Mir9-3	0.807506
	Mir449b	0.80476
	Mir338	0.79723
	Mir764	0.796195
	Mir129-1	0.79558
	Mir344f	0.793594
	Mir20a	0.793487
	Mir449c	0.789687
	Mir181c	0.787374
	Mir19a	0.781913
	Mir27b	0.775765
	Mir574	0.774788
	Mir23b	0.771707
	Mir185	0.769942
	Mir342	0.763528
	Mir196a-1	0.762975
	Mir1927	0.759943
	Mir7007	0.759463
	Mir3095	0.758969
	Mirlet7b	0.758346
	Mir1912	0.757754
	Mir130b	0.752799
	Mir3547	0.751119
	Mir455	0.742618
	Mir499	0.741101
	Mir181a-2	0.7374
	Mir378a	0.732552
	Mir331	0.730978
	Mir486	0.722925
	Mir181d	0.719199
	Mir129-2	0.715158
	Mir122	0.714073
	Mir770	0.703633
	Mir23a	0.702668
	Mir24-2	0.701987
	Mir504	0.697729
	Mir3081	0.696712
	Mir208b	0.691701
	Mir874	0.690325
	Mir701	0.689782
	Mir101a	0.687799
	Mir142	0.687425
	Mir544	0.687138
	Mir208a	0.680454
	Mir872	0.67971
	Mir218-2	0.678393
	Mir344c	0.674094
	Mir487b	0.672746
	Mir181b-2	0.672732
	Mir181a-1	0.671966
	Mir27a	0.668233
	Mir93	0.668024
	Mir3075	0.65185
	Mir106b	0.650799
	Mir155	0.650512
	Mir344b	0.641846
	Mir452	0.636801
	Mir149	0.634762
	Mir1306	0.630443
	Mir216a	0.629242
	Mir217	0.625942
	Mir362	0.62078
	Mir370	0.619905
	Mir3105	0.619654
	Mir125b-2	0.618073
	Mir139	0.611459
	Mir1955	0.609762
	Mir126a	0.60538
	Mir147	0.605349
	Mir511	0.60446
	Mir31	0.602466
	Mir3066	0.595034
	Mir7083	0.593573
	Mir501	0.592713
	Mir1249	0.592318
	Mir6923	0.59183
	Mir802	0.588404
	Mir132	0.587233
	Mir6539	0.586682
	Mir505	0.585335
	Mir99a	0.583263
	Mir181b-1	0.582382
	Mir5107	0.581745
	Mir301b	0.581604
	Mir224	0.578372
	Mir26b	0.576354
	Mir760	0.56919
	Gm23134	0.565617
	Mir3058	0.564639
	Mir6945	0.563173
	Mir194-2	0.556285
	Mir196a-2	0.553911
	Mir652	0.55298
	Mir7655	0.552814
	Mir188	0.550008
	Mir350	0.541162
	Mir212	0.527831
	Mir382	0.520042
	Mir676	0.517214
	Mir26a-1	0.514026
	Mir192	0.510534
	Mir1198	0.507157
	Mir25	0.50428
	Mir298	0.50036
	Mir133a-1	0.497112
	Mir326	0.494147
	Mir669e	0.49232
	Mir877	0.492219
	Mir34c	0.491637
	Mir532	0.487149
	Mir340	0.486626
	Mir1968	0.484936
	Mir323	0.484421
	Mir34a	0.462456
	Mir141	0.461439
	Mir668	0.460345
	Mir669c	0.45906
	Mir369	0.456634
	Mir99b	0.455054
	Mir451a	0.449911
	Mir467e	0.444092
	Mir3080	0.437982
	Mir15a	0.43488
	Mir34b	0.432682
	Mir467d	0.432253
	Mir381	0.429719
	Mir107	0.426962
	Mir15b	0.422818
	Mir26a-2	0.40679
	Mir1981	0.406321
	Mir330	0.398326
	Mir190a	0.392664
	Mir3062	0.392439
	Mir193b	0.391533
	Mir1a-2	0.388338
	Mir144	0.379348
	Mir3061	0.373617
	Mir345	0.372748
	Mir218-1	0.370053
	Mir5121	0.368052
	Mir669h	0.365814
	Mir700	0.365516
	Mir103-2	0.356839
	Mir666	0.352099
	Mir106a	0.351799
	Mir421	0.349746
	Mir433	0.343734
	Mir152	0.343532
	Mir669o	0.34195
	Mir1948	0.341702
	Mir485	0.33397
	Mir582	0.328765
	Mir7654	0.325888
	Mir669l	0.309165
	Mir140	0.305843
	Mir496a	0.303876
	Mir543	0.301774
	Mirlet7d	0.30104
	Mir301	0.299623
	Mir30d	0.296357
	Mir30c-2	0.290923
	Mir434	0.287086
	Mir30c-1	0.280651
	Mir412	0.278432
	Mir376a	0.274793
	Mir300	0.274462
	Mir423	0.263508
	Mir3107	0.263196
	Mir376b	0.25837
	Mir3064	0.257133
	Mirlet7c-1	0.254384
	Mir5113	0.251296
	Mir324	0.244951
	Mir3102	0.216829
	Mir151	0.215868
	Mir1983	0.214862
	Mir6538	0.214483
	Mir758	0.205365
	Mir154	0.201897
	Mir467c	0.196057
	Mir3071	0.191891
	Mir671	0.185291
	Mir1949	0.18303
	Mir495	0.179084
	Mir361	0.176695
	Mir374b	0.176576
	Mir136	0.175587
	Mir134	0.162134
	Mir500	0.161409
	Mir3535	0.152658
	Mir7-1	0.150721
	Mir30b	0.150079
	Mir1191	0.148677
	Mir215	0.148367
	Mir667	0.145921
	Mir194-1	0.145695
	Mir33	0.127227
	Mir16-2	0.124309
	Mir191	0.122339
	Mir410	0.119527
	Mir101b	0.108831
	Mir127	0.104677
	Mir541	0.101091
	Mir128-1	0.0985999
	Mir466n	0.0978076
	Mir2137	0.0970015
	Mir200c	0.0938786
	Mir339	0.0927138
	Mir1947	0.0901287
	Mir1188	0.0871447
	Mir125a	0.0867816
	Mir677	0.0722519
	Mirlet7f-1	0.0707102
	Mir16-1	0.0656273
	Mirlet7e	0.064358
	Mir1930	0.062592
	Mir702	0.0617172
	Mir30e	0.0501132
	Mir219a-1	0.034312
	Mir8114	0.0252349
	Mir5131	0.0241366
	Mir409	0.021554
	Mir1839	0.0170382
	Mir1843a	-0.0063979
	Snord43	-0.0070003
	Mir6994	-0.0107136
	Mirlet7a-1	-0.0242756
	Mir202	-0.0285564
	Mir341	-0.0447943
	Mir3072	-0.0462779
	Mir3057	-0.0600454
	Mir1197	-0.0605385
	Mir380	-0.0669018
	Mir539	-0.0732139
	Mir29b-1	-0.0762729
	Mir376c	-0.0891648
	Mirlet7a-2	-0.0931254
	Mir3070a	-0.101326
	Mir1843b	-0.104007
	Mir6546	-0.108944
	Mir21a	-0.115131
	Mir329	-0.120367
	Mir29c	-0.12125
	Mir377	-0.123711
	Mir3962	-0.123917
	Mir148b	-0.124089
	Gm23388	-0.132252
	Mir8112	-0.134128
	Mir673	-0.15308
	Mir7219	-0.173047
	Mir744	-0.199
	Mir665	-0.202355
	Mir411	-0.209658
	Mir337	-0.232431
	Mir186	-0.247518
	Mir540	-0.265004
	Gm26117	-0.265587
	Mir379	-0.28849
	Mir32	-0.297826
	Mir493	-0.312949
	Mir664	-0.315427
	Mir679	-0.330604
	Mir431	-0.332646
	Mir1193	-0.342854
	Mirlet7g	-0.354941
	Mir494	-0.402698
	Mir425	-0.403435
	Mir98	-0.463215
	Mir299a	-0.46361
	Mir5114	-0.475037
	Mir150	-0.501768
	Mirlet7f-2	-0.551903
	Gm23935	-0.710065
	Mir3068	-0.716785
