# Supplementary material for: Dynamics of microRNA expression during mouse prenatal development
Source: HighWire-hosted journal article supplement (doi:10.1101/gr.248997.119), 2019-10-23
Supplement: Supplemental_Table_S9.xlsx [file Supplemental_Table_S9.xlsx]

## Sheet: Sheet1
	List of differentially expressed mRNAs in mouse
	mRNA	cluster
	ENSMUSG00000001804.9	1
	ENSMUSG00000003053.17	2
	ENSMUSG00000004894.10	3
	ENSMUSG00000005232.11	4
	ENSMUSG00000005824.6	5
	ENSMUSG00000006056.13	6
	ENSMUSG00000006200.3	7
	ENSMUSG00000006310.10	8
	ENSMUSG00000006570.3	4
	ENSMUSG00000007594.9	3
	ENSMUSG00000008438.3	9
	ENSMUSG00000008845.9	10
	ENSMUSG00000009580.15	1
	ENSMUSG00000010592.8	3
	ENSMUSG00000015787.15	11
	ENSMUSG00000017310.7	4
	ENSMUSG00000019489.7	12
	ENSMUSG00000019900.17	13
	ENSMUSG00000019905.7	8
	ENSMUSG00000020090.7	3
	ENSMUSG00000020686.12	6
	ENSMUSG00000020734.13	14
	ENSMUSG00000020890.11	3
	ENSMUSG00000020891.11	15
	ENSMUSG00000021356.9	16
	ENSMUSG00000021363.13	6
	ENSMUSG00000021872.7	15
	ENSMUSG00000021879.12	17
	ENSMUSG00000021903.11	10
	ENSMUSG00000022041.10	16
	ENSMUSG00000022227.4	18
	ENSMUSG00000022315.3	13
	ENSMUSG00000022416.15	12
	ENSMUSG00000022534.13	19
	ENSMUSG00000022603.9	11
	ENSMUSG00000022715.2	3
	ENSMUSG00000022857.13	20
	ENSMUSG00000023279.7	10
	ENSMUSG00000023333.7	4
	ENSMUSG00000023902.18	21
	ENSMUSG00000024034.12	19
	ENSMUSG00000024107.6	12
	ENSMUSG00000024553.7	12
	ENSMUSG00000024680.12	13
	ENSMUSG00000024770.14	2
	ENSMUSG00000024979.13	7
	ENSMUSG00000025329.3	2
	ENSMUSG00000025496.5	4
	ENSMUSG00000026023.16	12
	ENSMUSG00000026114.14	11
	ENSMUSG00000026691.10	17
	ENSMUSG00000027322.11	19
	ENSMUSG00000027403.12	3
	ENSMUSG00000027788.6	22
	ENSMUSG00000027902.8	20
	ENSMUSG00000027908.2	1
	ENSMUSG00000028280.9	3
	ENSMUSG00000028558.14	12
	ENSMUSG00000028589.2	12
	ENSMUSG00000028747.10	3
	ENSMUSG00000028753.12	3
	ENSMUSG00000029112.5	14
	ENSMUSG00000029286.12	21
	ENSMUSG00000029337.2	3
	ENSMUSG00000029423.10	3
	ENSMUSG00000029680.2	2
	ENSMUSG00000029788.13	23
	ENSMUSG00000030147.12	17
	ENSMUSG00000030149.15	16
	ENSMUSG00000030158.12	17
	ENSMUSG00000030228.15	19
	ENSMUSG00000030230.15	3
	ENSMUSG00000030376.8	9
	ENSMUSG00000030402.5	3
	ENSMUSG00000030468.12	19
	ENSMUSG00000030577.13	19
	ENSMUSG00000030968.3	4
	ENSMUSG00000030972.6	4
	ENSMUSG00000031026.15	1
	ENSMUSG00000031130.3	3
	ENSMUSG00000031147.8	17
	ENSMUSG00000031212.3	3
	ENSMUSG00000031220.14	21
	ENSMUSG00000031374.13	12
	ENSMUSG00000031385.14	3
	ENSMUSG00000031492.13	3
	ENSMUSG00000031497.9	4
	ENSMUSG00000031510.5	24
	ENSMUSG00000031549.16	3
	ENSMUSG00000031551.12	3
	ENSMUSG00000031870.16	3
	ENSMUSG00000032023.7	22
	ENSMUSG00000032056.9	1
	ENSMUSG00000032257.5	2
	ENSMUSG00000032274.8	25
	ENSMUSG00000032343.15	2
	ENSMUSG00000032494.12	3
	ENSMUSG00000032671.5	5
	ENSMUSG00000033080.9	22
	ENSMUSG00000033177.13	9
	ENSMUSG00000033644.4	20
	ENSMUSG00000033774.4	3
	ENSMUSG00000033777.3	19
	ENSMUSG00000034151.13	6
	ENSMUSG00000034783.7	19
	ENSMUSG00000034959.7	18
	ENSMUSG00000035435.15	3
	ENSMUSG00000035528.4	24
	ENSMUSG00000035818.13	2
	ENSMUSG00000036027.11	19
	ENSMUSG00000036357.5	3
	ENSMUSG00000036587.13	19
	ENSMUSG00000036872.16	10
	ENSMUSG00000036958.5	2
	ENSMUSG00000037171.6	5
	ENSMUSG00000037627.15	6
	ENSMUSG00000037737.6	3
	ENSMUSG00000037953.7	2
	ENSMUSG00000037973.6	25
	ENSMUSG00000038115.16	10
	ENSMUSG00000038192.5	8
	ENSMUSG00000038840.7	24
	ENSMUSG00000038891.2	24
	ENSMUSG00000039059.11	9
	ENSMUSG00000039095.8	9
	ENSMUSG00000039097.5	3
	ENSMUSG00000039198.8	15
	ENSMUSG00000039200.15	21
	ENSMUSG00000039339.3	20
	ENSMUSG00000039358.3	3
	ENSMUSG00000039391.11	6
	ENSMUSG00000039552.13	6
	ENSMUSG00000039714.8	22
	ENSMUSG00000039720.7	3
	ENSMUSG00000039760.8	7
	ENSMUSG00000039775.7	2
	ENSMUSG00000040140.14	3
	ENSMUSG00000040264.10	20
	ENSMUSG00000040478.14	14
	ENSMUSG00000040495.4	9
	ENSMUSG00000040522.5	19
	ENSMUSG00000040627.14	12
	ENSMUSG00000041202.12	14
	ENSMUSG00000041293.5	19
	ENSMUSG00000041538.15	19
	ENSMUSG00000041550.4	19
	ENSMUSG00000041565.16	12
	ENSMUSG00000041644.14	4
	ENSMUSG00000041735.8	20
	ENSMUSG00000042250.13	11
	ENSMUSG00000042262.4	7
	ENSMUSG00000042477.7	22
	ENSMUSG00000043029.2	11
	ENSMUSG00000043144.5	4
	ENSMUSG00000043230.2	8
	ENSMUSG00000043383.4	8
	ENSMUSG00000043613.7	1
	ENSMUSG00000043659.11	4
	ENSMUSG00000043747.12	7
	ENSMUSG00000043850.15	4
	ENSMUSG00000044014.8	12
	ENSMUSG00000044162.11	17
	ENSMUSG00000044186.10	23
	ENSMUSG00000044243.3	21
	ENSMUSG00000044320.14	18
	ENSMUSG00000044359.1	2
	ENSMUSG00000044453.5	13
	ENSMUSG00000044518.3	22
	ENSMUSG00000044827.10	19
	ENSMUSG00000044903.15	16
	ENSMUSG00000044933.2	12
	ENSMUSG00000044988.7	20
	ENSMUSG00000045246.11	11
	ENSMUSG00000045314.5	20
	ENSMUSG00000045330.8	2
	ENSMUSG00000045331.3	7
	ENSMUSG00000045364.2	2
	ENSMUSG00000045662.16	9
	ENSMUSG00000045709.10	17
	ENSMUSG00000045903.8	10
	ENSMUSG00000046518.3	22
	ENSMUSG00000046585.8	6
	ENSMUSG00000046610.14	14
	ENSMUSG00000046717.5	25
	ENSMUSG00000046845.1	11
	ENSMUSG00000046942.17	5
	ENSMUSG00000047990.5	5
	ENSMUSG00000048003.12	13
	ENSMUSG00000048498.7	5
	ENSMUSG00000049123.10	12
	ENSMUSG00000049133.6	2
	ENSMUSG00000049565.16	7
	ENSMUSG00000050028.4	1
	ENSMUSG00000050122.18	10
	ENSMUSG00000050158.5	20
	ENSMUSG00000050239.2	1
	ENSMUSG00000050395.8	17
	ENSMUSG00000050534.8	3
	ENSMUSG00000050625.4	6
	ENSMUSG00000050650.7	3
	ENSMUSG00000050675.7	5
	ENSMUSG00000050783.4	3
	ENSMUSG00000050824.11	3
	ENSMUSG00000050844.5	20
	ENSMUSG00000050963.6	3
	ENSMUSG00000051136.1	12
	ENSMUSG00000051172.5	1
	ENSMUSG00000051207.7	3
	ENSMUSG00000051504.18	26
	ENSMUSG00000051592.14	18
	ENSMUSG00000052099.13	2
	ENSMUSG00000052295.4	7
	ENSMUSG00000053185.2	17
	ENSMUSG00000053216.14	21
	ENSMUSG00000053303.14	4
	ENSMUSG00000053338.9	13
	ENSMUSG00000053640.2	25
	ENSMUSG00000053863.3	1
	ENSMUSG00000054005.4	7
	ENSMUSG00000054258.8	23
	ENSMUSG00000054360.3	9
	ENSMUSG00000054418.6	7
	ENSMUSG00000054488.14	17
	ENSMUSG00000055033.3	5
	ENSMUSG00000055102.15	24
	ENSMUSG00000055408.7	21
	ENSMUSG00000055523.6	4
	ENSMUSG00000055960.12	27
	ENSMUSG00000056043.5	23
	ENSMUSG00000056306.5	3
	ENSMUSG00000056329.3	13
	ENSMUSG00000056350.6	1
	ENSMUSG00000056716.9	5
	ENSMUSG00000056728.5	11
	ENSMUSG00000056829.3	22
	ENSMUSG00000057000.12	23
	ENSMUSG00000057246.14	12
	ENSMUSG00000057439.12	3
	ENSMUSG00000057855.2	1
	ENSMUSG00000058019.12	3
	ENSMUSG00000058057.4	14
	ENSMUSG00000058172.1	1
	ENSMUSG00000058368.2	1
	ENSMUSG00000058398.6	3
	ENSMUSG00000058400.13	12
	ENSMUSG00000058618.6	20
	ENSMUSG00000058884.4	1
	ENSMUSG00000059280.3	19
	ENSMUSG00000059463.7	4
	ENSMUSG00000059994.10	5
	ENSMUSG00000060508.16	20
	ENSMUSG00000060890.11	23
	ENSMUSG00000061584.6	1
	ENSMUSG00000061988.3	1
	ENSMUSG00000062327.10	24
	ENSMUSG00000062400.2	1
	ENSMUSG00000062433.3	1
	ENSMUSG00000062496.9	7
	ENSMUSG00000063089.4	13
	ENSMUSG00000063388.4	19
	ENSMUSG00000063558.4	17
	ENSMUSG00000063681.14	9
	ENSMUSG00000064165.8	4
	ENSMUSG00000065956.2	20
	ENSMUSG00000066060.5	23
	ENSMUSG00000066364.2	16
	ENSMUSG00000066513.4	13
	ENSMUSG00000066515.3	13
	ENSMUSG00000066797.6	3
	ENSMUSG00000067642.11	15
	ENSMUSG00000067714.13	13
	ENSMUSG00000067750.3	27
	ENSMUSG00000067767.5	19
	ENSMUSG00000068073.2	7
	ENSMUSG00000068074.2	1
	ENSMUSG00000068075.2	1
	ENSMUSG00000068083.1	16
	ENSMUSG00000068302.8	8
	ENSMUSG00000069053.11	9
	ENSMUSG00000069259.10	20
	ENSMUSG00000069722.4	1
	ENSMUSG00000069733.11	4
	ENSMUSG00000070023.5	4
	ENSMUSG00000070323.11	19
	ENSMUSG00000070419.11	16
	ENSMUSG00000070504.9	21
	ENSMUSG00000070531.4	17
	ENSMUSG00000070533.11	17
	ENSMUSG00000070687.11	3
	ENSMUSG00000070868.11	11
	ENSMUSG00000070873.5	19
	ENSMUSG00000070877.4	17
	ENSMUSG00000071113.4	11
	ENSMUSG00000071204.10	16
	ENSMUSG00000071537.6	11
	ENSMUSG00000071636.6	9
	ENSMUSG00000071665.10	3
	ENSMUSG00000072145.2	22
	ENSMUSG00000072492.5	9
	ENSMUSG00000072575.3	4
	ENSMUSG00000072723.10	3
	ENSMUSG00000072754.9	8
	ENSMUSG00000073052.3	14
	ENSMUSG00000073077.6	3
	ENSMUSG00000073375.2	7
	ENSMUSG00000073491.10	17
	ENSMUSG00000073764.2	2
	ENSMUSG00000073830.11	7
	ENSMUSG00000074004.3	3
	ENSMUSG00000074060.10	4
	ENSMUSG00000074252.2	9
	ENSMUSG00000074444.4	20
	ENSMUSG00000074595.9	8
	ENSMUSG00000074679.3	4
	ENSMUSG00000074771.10	9
	ENSMUSG00000075570.2	1
	ENSMUSG00000076577.2	16
	ENSMUSG00000076587.3	4
	ENSMUSG00000078117.2	12
	ENSMUSG00000078487.8	17
	ENSMUSG00000078504.2	20
	ENSMUSG00000078507.1	2
	ENSMUSG00000078599.9	11
	ENSMUSG00000078612.9	19
	ENSMUSG00000078673.10	7
	ENSMUSG00000078674.2	7
	ENSMUSG00000078680.3	7
	ENSMUSG00000078683.9	7
	ENSMUSG00000078686.11	7
	ENSMUSG00000078688.11	7
	ENSMUSG00000078998.3	2
	ENSMUSG00000079029.2	4
	ENSMUSG00000079051.4	12
	ENSMUSG00000079070.10	9
	ENSMUSG00000079103.2	13
	ENSMUSG00000079114.3	20
	ENSMUSG00000079299.3	3
	ENSMUSG00000079494.2	20
	ENSMUSG00000079536.1	7
	ENSMUSG00000079604.9	7
	ENSMUSG00000079606.1	5
	ENSMUSG00000080978.2	3
	ENSMUSG00000081044.8	5
	ENSMUSG00000081662.1	19
	ENSMUSG00000082365.2	5
	ENSMUSG00000082404.1	3
	ENSMUSG00000082815.2	2
	ENSMUSG00000083307.1	10
	ENSMUSG00000083671.1	5
	ENSMUSG00000083916.2	4
	ENSMUSG00000084346.4	4
	ENSMUSG00000084904.1	9
	ENSMUSG00000084927.1	7
	ENSMUSG00000084929.1	15
	ENSMUSG00000084939.2	13
	ENSMUSG00000084966.1	22
	ENSMUSG00000085007.2	9
	ENSMUSG00000085272.7	15
	ENSMUSG00000085451.1	13
	ENSMUSG00000085468.1	19
	ENSMUSG00000085562.7	4
	ENSMUSG00000085584.3	1
	ENSMUSG00000085591.1	22
	ENSMUSG00000085634.1	5
	ENSMUSG00000085918.1	21
	ENSMUSG00000085967.1	11
	ENSMUSG00000086071.7	16
	ENSMUSG00000086095.2	15
	ENSMUSG00000086272.1	3
	ENSMUSG00000086319.1	10
	ENSMUSG00000086386.1	4
	ENSMUSG00000086437.2	19
	ENSMUSG00000086662.7	3
	ENSMUSG00000086813.1	13
	ENSMUSG00000086822.2	3
	ENSMUSG00000086847.1	4
	ENSMUSG00000086861.1	2
	ENSMUSG00000086904.1	9
	ENSMUSG00000087035.1	1
	ENSMUSG00000087084.1	3
	ENSMUSG00000087148.1	3
	ENSMUSG00000087149.8	7
	ENSMUSG00000087166.9	21
	ENSMUSG00000087278.1	2
	ENSMUSG00000087410.7	21
	ENSMUSG00000087450.1	19
	ENSMUSG00000087547.1	5
	ENSMUSG00000087591.7	7
	ENSMUSG00000087648.1	23
	ENSMUSG00000087675.1	12
	ENSMUSG00000088252.1	13
	ENSMUSG00000089301.1	4
	ENSMUSG00000089815.7	9
	ENSMUSG00000090051.1	5
	ENSMUSG00000090129.8	3
	ENSMUSG00000090249.8	5
	ENSMUSG00000090291.2	20
	ENSMUSG00000090306.5	16
	ENSMUSG00000090326.1	23
	ENSMUSG00000090336.3	22
	ENSMUSG00000090485.1	4
	ENSMUSG00000090667.2	7
	ENSMUSG00000091122.8	22
	ENSMUSG00000091648.2	9
	ENSMUSG00000091972.1	4
	ENSMUSG00000092075.1	16
	ENSMUSG00000092090.2	3
	ENSMUSG00000092178.2	18
	ENSMUSG00000093394.1	3
	ENSMUSG00000093622.1	20
	ENSMUSG00000093867.7	20
	ENSMUSG00000093910.1	3
	ENSMUSG00000093916.1	16
	ENSMUSG00000093953.2	3
	ENSMUSG00000094025.7	14
	ENSMUSG00000094219.1	20
	ENSMUSG00000094328.2	13
	ENSMUSG00000094559.1	2
	ENSMUSG00000094707.1	3
	ENSMUSG00000094841.2	9
	ENSMUSG00000094877.2	3
	ENSMUSG00000095066.1	20
	ENSMUSG00000095300.1	8
	ENSMUSG00000095457.3	20
	ENSMUSG00000095589.2	16
	ENSMUSG00000095654.2	12
	ENSMUSG00000095822.2	13
	ENSMUSG00000095992.1	1
	ENSMUSG00000096140.1	6
	ENSMUSG00000096336.2	16
	ENSMUSG00000096632.2	14
	ENSMUSG00000096674.1	7
	ENSMUSG00000096918.1	23
	ENSMUSG00000096997.1	14
	ENSMUSG00000097050.1	21
	ENSMUSG00000097134.1	9
	ENSMUSG00000097339.5	8
	ENSMUSG00000097448.1	17
	ENSMUSG00000097624.1	13
	ENSMUSG00000097651.1	4
	ENSMUSG00000097754.1	7
	ENSMUSG00000097776.1	15
	ENSMUSG00000097881.7	22
	ENSMUSG00000097939.1	11
	ENSMUSG00000098008.1	2
	ENSMUSG00000098014.1	4
	ENSMUSG00000098053.1	13
	ENSMUSG00000098075.1	3
	ENSMUSG00000098160.3	3
	ENSMUSG00000098370.1	4
	ENSMUSG00000098768.1	21
	ENSMUSG00000098895.1	13
	ENSMUSG00000099229.1	21
	ENSMUSG00000099503.1	12
	ENSMUSG00000099512.1	9
	ENSMUSG00000099625.1	12
	ENSMUSG00000099664.1	22
	ENSMUSG00000099696.6	25
	ENSMUSG00000099717.1	9
	ENSMUSG00000099784.1	12
	ENSMUSG00000099936.1	15
	ENSMUSG00000099950.1	25
	ENSMUSG00000100157.6	16
	ENSMUSG00000100168.1	22
	ENSMUSG00000100255.1	10
	ENSMUSG00000100457.6	15
	ENSMUSG00000100733.2	2
	ENSMUSG00000100851.1	3
	ENSMUSG00000101011.6	3
	ENSMUSG00000101397.6	16
	ENSMUSG00000101483.1	16
	ENSMUSG00000101514.1	16
	ENSMUSG00000101605.1	17
	ENSMUSG00000101734.1	22
	ENSMUSG00000101860.1	15
	ENSMUSG00000102047.1	20
	ENSMUSG00000102123.1	9
	ENSMUSG00000102163.1	13
	ENSMUSG00000102185.1	20
	ENSMUSG00000102240.1	12
	ENSMUSG00000102261.1	15
	ENSMUSG00000102309.1	3
	ENSMUSG00000102336.1	28
	ENSMUSG00000102531.1	15
	ENSMUSG00000102729.1	9
	ENSMUSG00000102753.1	12
	ENSMUSG00000102814.1	22
	ENSMUSG00000102917.1	20
	ENSMUSG00000103082.1	9
	ENSMUSG00000103259.1	21
	ENSMUSG00000103938.1	3
	ENSMUSG00000103947.1	3
	ENSMUSG00000104036.1	3
	ENSMUSG00000104173.1	2
	ENSMUSG00000104282.1	9
	ENSMUSG00000104340.1	2
	ENSMUSG00000104350.1	13
	ENSMUSG00000104362.1	9
	ENSMUSG00000104423.1	1
	ENSMUSG00000104607.1	4
	ENSMUSG00000104610.1	4
	ENSMUSG00000104718.1	20
	ENSMUSG00000104918.1	9
	ENSMUSG00000105152.1	22
	ENSMUSG00000105186.1	4
	ENSMUSG00000105258.1	15
	ENSMUSG00000105296.1	15
	ENSMUSG00000105416.1	2
	ENSMUSG00000105816.4	23
	ENSMUSG00000105850.1	9
	ENSMUSG00000105907.1	19
	ENSMUSG00000105912.1	12
	ENSMUSG00000106052.1	17
	ENSMUSG00000106060.1	3
	ENSMUSG00000106498.1	4
	ENSMUSG00000106501.1	19
	ENSMUSG00000106634.1	17
	ENSMUSG00000106694.1	12
	ENSMUSG00000106718.1	24
	ENSMUSG00000106905.1	9
	ENSMUSG00000107008.3	9
	ENSMUSG00000107089.1	10
	ENSMUSG00000107198.1	10
	ENSMUSG00000107251.1	23
	ENSMUSG00000107256.1	21
	ENSMUSG00000107300.1	9
	ENSMUSG00000107385.3	3
	ENSMUSG00000107405.1	3
	ENSMUSG00000107451.1	3
	ENSMUSG00000107479.1	14
	ENSMUSG00000107653.1	15
	ENSMUSG00000107667.2	3
	ENSMUSG00000107728.1	23
	ENSMUSG00000107761.1	13
	ENSMUSG00000107811.1	22
	ENSMUSG00000107832.1	12
	ENSMUSG00000107850.1	20
	ENSMUSG00000108022.1	3
	ENSMUSG00000108134.1	16
	ENSMUSG00000108137.1	9
	ENSMUSG00000108213.1	20
	ENSMUSG00000108290.1	4
	ENSMUSG00000108325.1	3
	ENSMUSG00000108417.1	17
	ENSMUSG00000108470.1	11
	ENSMUSG00000108657.1	19
	ENSMUSG00000108713.1	9
	ENSMUSG00000108776.1	12
	ENSMUSG00000108961.1	16
	ENSMUSG00000109013.1	9
	ENSMUSG00000109160.1	3
	ENSMUSG00000109170.1	16
	ENSMUSG00000109209.1	9
	ENSMUSG00000109401.1	3
	ENSMUSG00000109419.1	15
	ENSMUSG00000109473.1	16
	ENSMUSG00000109533.1	12
	ENSMUSG00000109582.1	22
	ENSMUSG00000109761.1	10
	ENSMUSG00000109831.1	5
	ENSMUSG00000109870.1	22
	ENSMUSG00000109871.1	15
	ENSMUSG00000109882.1	10
	ENSMUSG00000109898.1	9
	ENSMUSG00000109903.1	18
	ENSMUSG00000109917.1	4
	ENSMUSG00000110016.1	12
	ENSMUSG00000110035.1	16
	ENSMUSG00000110151.1	19
	ENSMUSG00000110212.1	22
	ENSMUSG00000110231.1	13
	ENSMUSG00000110249.1	12
	ENSMUSG00000110260.1	12
	ENSMUSG00000110274.1	22
	ENSMUSG00000110298.1	26
	ENSMUSG00000110358.1	3
	ENSMUSG00000110380.1	17
	ENSMUSG00000110396.1	12
	MSTRG.10001	3
	MSTRG.10004	17
	MSTRG.10005	12
	MSTRG.10007	29
	MSTRG.10008	11
	MSTRG.10009	9
	MSTRG.10015	24
	MSTRG.10016	17
	MSTRG.10017	9
	MSTRG.1002	19
	MSTRG.10020	9
	MSTRG.10022	4
	MSTRG.10023	4
	MSTRG.10025	3
	MSTRG.10026	22
	MSTRG.10028	22
	MSTRG.10029	22
	MSTRG.1003	9
	MSTRG.10030	22
	MSTRG.10031	15
	MSTRG.10032	17
	MSTRG.10033	15
	MSTRG.10036	15
	MSTRG.10037	30
	MSTRG.10039	6
	MSTRG.1004	24
	MSTRG.10040	20
	MSTRG.10041	3
	MSTRG.10042	4
	MSTRG.10045	20
	MSTRG.10046	20
	MSTRG.10048	24
	MSTRG.10049	21
	MSTRG.1005	12
	MSTRG.10051	29
	MSTRG.10053	9
	MSTRG.10054	3
	MSTRG.10055	3
	MSTRG.10057	29
	MSTRG.10058	20
	MSTRG.10059	9
	MSTRG.10060	28
	MSTRG.10061	13
	MSTRG.10062	15
	MSTRG.10065	15
	MSTRG.10066	9
	MSTRG.10068	21
	MSTRG.1007	28
	MSTRG.10071	19
	MSTRG.10072	21
	MSTRG.10075	29
	MSTRG.10076	13
	MSTRG.10077	5
	MSTRG.10079	10
	MSTRG.1008	30
	MSTRG.10082	30
	MSTRG.10084	5
	MSTRG.10089	20
	MSTRG.10091	26
	MSTRG.10092	21
	MSTRG.10096	3
	MSTRG.10099	5
	MSTRG.1010	16
	MSTRG.10100	6
	MSTRG.10101	4
	MSTRG.10103	3
	MSTRG.1011	16
	MSTRG.10111	24
	MSTRG.10112	9
	MSTRG.10115	28
	MSTRG.10117	22
	MSTRG.10118	22
	MSTRG.1012	18
	MSTRG.10121	28
	MSTRG.10122	28
	MSTRG.10133	22
	MSTRG.10134	22
	MSTRG.10135	11
	MSTRG.10136	3
	MSTRG.10147	25
	MSTRG.10148	12
	MSTRG.10149	9
	MSTRG.10150	9
	MSTRG.10151	9
	MSTRG.10153	9
	MSTRG.10157	9
	MSTRG.10158	22
	MSTRG.1016	19
	MSTRG.10165	15
	MSTRG.1017	17
	MSTRG.10171	9
	MSTRG.10172	18
	MSTRG.10173	23
	MSTRG.10185	25
	MSTRG.10186	30
	MSTRG.10187	15
	MSTRG.10191	9
	MSTRG.10192	3
	MSTRG.10194	19
	MSTRG.10198	15
	MSTRG.1020	10
	MSTRG.10200	3
	MSTRG.10203	3
	MSTRG.10206	29
	MSTRG.10209	18
	MSTRG.1021	13
	MSTRG.10211	18
	MSTRG.10214	18
	MSTRG.10216	24
	MSTRG.10221	16
	MSTRG.10222	16
	MSTRG.10225	16
	MSTRG.10226	16
	MSTRG.10233	4
	MSTRG.10237	12
	MSTRG.1024	15
	MSTRG.10243	9
	MSTRG.10245	4
	MSTRG.10248	21
	MSTRG.10251	9
	MSTRG.10254	12
	MSTRG.10256	13
	MSTRG.10258	18
	MSTRG.1026	11
	MSTRG.10260	20
	MSTRG.10262	5
	MSTRG.10265	12
	MSTRG.10269	9
	MSTRG.10271	9
	MSTRG.10272	3
	MSTRG.1028	19
	MSTRG.10280	20
	MSTRG.10281	26
	MSTRG.10284	9
	MSTRG.10285	3
	MSTRG.10286	18
	MSTRG.10289	20
	MSTRG.1029	8
	MSTRG.10292	3
	MSTRG.10298	9
	MSTRG.103	4
	MSTRG.1030	20
	MSTRG.10302	9
	MSTRG.10305	4
	MSTRG.10306	24
	MSTRG.10307	3
	MSTRG.10309	9
	MSTRG.1031	24
	MSTRG.10311	4
	MSTRG.10315	4
	MSTRG.10317	4
	MSTRG.10318	2
	MSTRG.10320	13
	MSTRG.10322	11
	MSTRG.10328	22
	MSTRG.1033	24
	MSTRG.10332	23
	MSTRG.10337	9
	MSTRG.10338	23
	MSTRG.10339	10
	MSTRG.10343	9
	MSTRG.10344	24
	MSTRG.10345	20
	MSTRG.10348	20
	MSTRG.1035	3
	MSTRG.10350	20
	MSTRG.10351	20
	MSTRG.10352	20
	MSTRG.10358	13
	MSTRG.10360	13
	MSTRG.10365	30
	MSTRG.10368	30
	MSTRG.10369	15
	MSTRG.10370	29
	MSTRG.10372	29
	MSTRG.10375	5
	MSTRG.10385	10
	MSTRG.10393	10
	MSTRG.10396	15
	MSTRG.1040	28
	MSTRG.10401	18
	MSTRG.10405	3
	MSTRG.10406	9
	MSTRG.10408	9
	MSTRG.10409	29
	MSTRG.1041	29
	MSTRG.10410	30
	MSTRG.10411	15
	MSTRG.10412	18
	MSTRG.10419	3
	MSTRG.1042	23
	MSTRG.10421	3
	MSTRG.10422	3
	MSTRG.10423	12
	MSTRG.10425	3
	MSTRG.10429	29
	MSTRG.1043	18
	MSTRG.10432	5
	MSTRG.10437	15
	MSTRG.1044	21
	MSTRG.10441	26
	MSTRG.10445	9
	MSTRG.10449	4
	MSTRG.10451	9
	MSTRG.10453	2
	MSTRG.10456	29
	MSTRG.10457	12
	MSTRG.1046	7
	MSTRG.10460	13
	MSTRG.10464	9
	MSTRG.10466	19
	MSTRG.10470	10
	MSTRG.10479	13
	MSTRG.10481	4
	MSTRG.10482	12
	MSTRG.10485	18
	MSTRG.10493	17
	MSTRG.10496	24
	MSTRG.10497	18
	MSTRG.10498	6
	MSTRG.10499	6
	MSTRG.10500	6
	MSTRG.10505	27
	MSTRG.10508	18
	MSTRG.10509	18
	MSTRG.1051	12
	MSTRG.10511	15
	MSTRG.10518	21
	MSTRG.10519	10
	MSTRG.1052	22
	MSTRG.10520	8
	MSTRG.10523	23
	MSTRG.10525	14
	MSTRG.10526	28
	MSTRG.1053	21
	MSTRG.10531	12
	MSTRG.10533	24
	MSTRG.10534	22
	MSTRG.10539	3
	MSTRG.1054	6
	MSTRG.10546	8
	MSTRG.10548	18
	MSTRG.10550	23
	MSTRG.10552	9
	MSTRG.10553	15
	MSTRG.10558	9
	MSTRG.10559	28
	MSTRG.1056	13
	MSTRG.10561	9
	MSTRG.10565	12
	MSTRG.10581	3
	MSTRG.10586	10
	MSTRG.1059	26
	MSTRG.10591	3
	MSTRG.10597	3
	MSTRG.10599	3
	MSTRG.106	6
	MSTRG.10606	3
	MSTRG.10609	3
	MSTRG.10610	3
	MSTRG.10611	3
	MSTRG.10617	3
	MSTRG.10618	3
	MSTRG.10619	3
	MSTRG.10624	3
	MSTRG.10625	3
	MSTRG.1063	4
	MSTRG.10634	3
	MSTRG.10639	3
	MSTRG.10646	12
	MSTRG.10648	12
	MSTRG.1065	5
	MSTRG.10650	3
	MSTRG.10651	3
	MSTRG.10652	3
	MSTRG.10660	3
	MSTRG.10666	3
	MSTRG.10675	12
	MSTRG.10678	3
	MSTRG.1068	3
	MSTRG.10680	3
	MSTRG.10683	3
	MSTRG.10687	3
	MSTRG.10689	12
	MSTRG.10692	3
	MSTRG.10694	19
	MSTRG.10696	11
	MSTRG.10702	10
	MSTRG.10703	15
	MSTRG.10704	19
	MSTRG.10705	4
	MSTRG.10708	2
	MSTRG.10709	23
	MSTRG.1071	3
	MSTRG.10711	10
	MSTRG.10724	28
	MSTRG.10729	25
	MSTRG.10732	9
	MSTRG.10735	17
	MSTRG.10737	3
	MSTRG.10739	17
	MSTRG.10750	13
	MSTRG.10754	22
	MSTRG.10756	3
	MSTRG.10759	15
	MSTRG.1076	15
	MSTRG.10764	13
	MSTRG.10765	28
	MSTRG.10766	14
	MSTRG.10768	20
	MSTRG.10773	15
	MSTRG.10775	3
	MSTRG.1078	23
	MSTRG.10786	2
	MSTRG.10787	2
	MSTRG.10790	3
	MSTRG.10796	9
	MSTRG.10797	18
	MSTRG.10800	9
	MSTRG.10803	4
	MSTRG.10804	13
	MSTRG.10805	13
	MSTRG.10808	24
	MSTRG.1081	9
	MSTRG.10810	6
	MSTRG.10812	5
	MSTRG.10814	21
	MSTRG.10815	9
	MSTRG.10818	24
	MSTRG.1082	9
	MSTRG.10821	18
	MSTRG.10822	15
	MSTRG.10827	3
	MSTRG.10828	15
	MSTRG.10829	4
	MSTRG.10831	23
	MSTRG.10833	23
	MSTRG.10837	28
	MSTRG.1084	9
	MSTRG.10842	3
	MSTRG.10845	15
	MSTRG.10846	26
	MSTRG.10848	21
	MSTRG.10850	4
	MSTRG.10871	12
	MSTRG.10877	21
	MSTRG.10881	21
	MSTRG.10883	20
	MSTRG.10887	9
	MSTRG.10890	15
	MSTRG.10895	13
	MSTRG.10898	13
	MSTRG.109	19
	MSTRG.1090	3
	MSTRG.10901	17
	MSTRG.10902	11
	MSTRG.10906	17
	MSTRG.10907	13
	MSTRG.10909	6
	MSTRG.10910	15
	MSTRG.10912	15
	MSTRG.1092	28
	MSTRG.10924	9
	MSTRG.10925	5
	MSTRG.10926	24
	MSTRG.10927	17
	MSTRG.10931	24
	MSTRG.10933	12
	MSTRG.10936	21
	MSTRG.10938	21
	MSTRG.10939	21
	MSTRG.10940	30
	MSTRG.10941	25
	MSTRG.10942	12
	MSTRG.10944	22
	MSTRG.1095	22
	MSTRG.10950	19
	MSTRG.10951	19
	MSTRG.10953	10
	MSTRG.10955	21
	MSTRG.1096	22
	MSTRG.10966	16
	MSTRG.10967	16
	MSTRG.10968	16
	MSTRG.1097	22
	MSTRG.10971	15
	MSTRG.10974	21
	MSTRG.10976	12
	MSTRG.10979	30
	MSTRG.10982	29
	MSTRG.10987	29
	MSTRG.10989	16
	MSTRG.10991	13
	MSTRG.10996	17
	MSTRG.10999	5
	MSTRG.11	12
	MSTRG.110	11
	MSTRG.1100	20
	MSTRG.11004	6
	MSTRG.11005	14
	MSTRG.11006	14
	MSTRG.11007	14
	MSTRG.11008	9
	MSTRG.11009	14
	MSTRG.11010	15
	MSTRG.11012	19
	MSTRG.11014	8
	MSTRG.11017	5
	MSTRG.1102	2
	MSTRG.11020	17
	MSTRG.11023	9
	MSTRG.11024	18
	MSTRG.11025	7
	MSTRG.11026	5
	MSTRG.11028	12
	MSTRG.11032	11
	MSTRG.11034	10
	MSTRG.11036	9
	MSTRG.11039	26
	MSTRG.11040	2
	MSTRG.11041	14
	MSTRG.11042	23
	MSTRG.11046	5
	MSTRG.11047	15
	MSTRG.1105	13
	MSTRG.11053	3
	MSTRG.11058	3
	MSTRG.11059	3
	MSTRG.11060	20
	MSTRG.11061	15
	MSTRG.11066	12
	MSTRG.11071	9
	MSTRG.11073	9
	MSTRG.11076	12
	MSTRG.11077	12
	MSTRG.11081	27
	MSTRG.11085	6
	MSTRG.11086	15
	MSTRG.11088	5
	MSTRG.11089	16
	MSTRG.11091	17
	MSTRG.11092	19
	MSTRG.11093	17
	MSTRG.11099	5
	MSTRG.11102	23
	MSTRG.11105	17
	MSTRG.11109	10
	MSTRG.11114	17
	MSTRG.11117	9
	MSTRG.11119	9
	MSTRG.11120	30
	MSTRG.11123	30
	MSTRG.11125	23
	MSTRG.11130	9
	MSTRG.11140	16
	MSTRG.11141	4
	MSTRG.11142	8
	MSTRG.11143	8
	MSTRG.11144	5
	MSTRG.11146	9
	MSTRG.11147	30
	MSTRG.11149	17
	MSTRG.1115	7
	MSTRG.11150	23
	MSTRG.11154	19
	MSTRG.11157	29
	MSTRG.11162	29
	MSTRG.11163	11
	MSTRG.11165	29
	MSTRG.11173	22
	MSTRG.11174	22
	MSTRG.11179	5
	MSTRG.11183	22
	MSTRG.11184	22
	MSTRG.11191	24
	MSTRG.11192	21
	MSTRG.11193	28
	MSTRG.11197	13
	MSTRG.11199	3
	MSTRG.1120	3
	MSTRG.11202	24
	MSTRG.11205	24
	MSTRG.1121	20
	MSTRG.11211	9
	MSTRG.11218	3
	MSTRG.11219	3
	MSTRG.11222	8
	MSTRG.11223	3
	MSTRG.11229	4
	MSTRG.11232	24
	MSTRG.11233	20
	MSTRG.11235	13
	MSTRG.11236	19
	MSTRG.11238	13
	MSTRG.11240	20
	MSTRG.11255	5
	MSTRG.11256	15
	MSTRG.1126	9
	MSTRG.11261	20
	MSTRG.11262	24
	MSTRG.11265	24
	MSTRG.11267	28
	MSTRG.11270	22
	MSTRG.11271	22
	MSTRG.11275	9
	MSTRG.1129	3
	MSTRG.11310	27
	MSTRG.11322	27
	MSTRG.11327	20
	MSTRG.11343	15
	MSTRG.11344	13
	MSTRG.11347	20
	MSTRG.11349	18
	MSTRG.11351	13
	MSTRG.11353	9
	MSTRG.11355	24
	MSTRG.11357	29
	MSTRG.11358	21
	MSTRG.11364	19
	MSTRG.11365	20
	MSTRG.11370	10
	MSTRG.11373	27
	MSTRG.11374	9
	MSTRG.11383	21
	MSTRG.11384	3
	MSTRG.11385	3
	MSTRG.11387	15
	MSTRG.11388	15
	MSTRG.11390	23
	MSTRG.11395	1
	MSTRG.11397	9
	MSTRG.11398	9
	MSTRG.11399	10
	MSTRG.11401	3
	MSTRG.11406	26
	MSTRG.11417	11
	MSTRG.11421	20
	MSTRG.11423	20
	MSTRG.11424	20
	MSTRG.11425	19
	MSTRG.11426	8
	MSTRG.11428	20
	MSTRG.11431	21
	MSTRG.11435	7
	MSTRG.11436	7
	MSTRG.1144	12
	MSTRG.11440	7
	MSTRG.11446	11
	MSTRG.11448	10
	MSTRG.11449	1
	MSTRG.11451	19
	MSTRG.11454	16
	MSTRG.11457	4
	MSTRG.11459	30
	MSTRG.11461	24
	MSTRG.11463	15
	MSTRG.11464	16
	MSTRG.11468	28
	MSTRG.11471	13
	MSTRG.11473	15
	MSTRG.11474	7
	MSTRG.11475	7
	MSTRG.11477	10
	MSTRG.11478	24
	MSTRG.11479	13
	MSTRG.1148	28
	MSTRG.11482	28
	MSTRG.11485	10
	MSTRG.11486	12
	MSTRG.1149	28
	MSTRG.11490	18
	MSTRG.11496	29
	MSTRG.11504	9
	MSTRG.11505	15
	MSTRG.11506	10
	MSTRG.11513	24
	MSTRG.11514	17
	MSTRG.11515	29
	MSTRG.11518	29
	MSTRG.11520	21
	MSTRG.11521	12
	MSTRG.11528	9
	MSTRG.11529	9
	MSTRG.11530	22
	MSTRG.11533	11
	MSTRG.11536	24
	MSTRG.11538	9
	MSTRG.11540	15
	MSTRG.11542	19
	MSTRG.11544	7
	MSTRG.11546	28
	MSTRG.11548	3
	MSTRG.1155	20
	MSTRG.11551	9
	MSTRG.1156	5
	MSTRG.11560	12
	MSTRG.11561	30
	MSTRG.11562	25
	MSTRG.11566	3
	MSTRG.11567	12
	MSTRG.1157	27
	MSTRG.11574	24
	MSTRG.11579	4
	MSTRG.11580	15
	MSTRG.11581	15
	MSTRG.11582	23
	MSTRG.11583	16
	MSTRG.11584	20
	MSTRG.11585	26
	MSTRG.11587	23
	MSTRG.11588	22
	MSTRG.11589	13
	MSTRG.1159	17
	MSTRG.11591	28
	MSTRG.11593	9
	MSTRG.11596	24
	MSTRG.11597	23
	MSTRG.1160	10
	MSTRG.11601	15
	MSTRG.11602	9
	MSTRG.11609	24
	MSTRG.11611	22
	MSTRG.11612	22
	MSTRG.11614	24
	MSTRG.11615	9
	MSTRG.11616	8
	MSTRG.11617	12
	MSTRG.11618	9
	MSTRG.11620	29
	MSTRG.11621	30
	MSTRG.11623	7
	MSTRG.11624	11
	MSTRG.11625	5
	MSTRG.11629	19
	MSTRG.11630	23
	MSTRG.11632	9
	MSTRG.11633	3
	MSTRG.11634	12
	MSTRG.11638	9
	MSTRG.11640	12
	MSTRG.11646	21
	MSTRG.11648	21
	MSTRG.11649	21
	MSTRG.11650	21
	MSTRG.11652	21
	MSTRG.11653	21
	MSTRG.11657	25
	MSTRG.11658	29
	MSTRG.11659	30
	MSTRG.11660	4
	MSTRG.11665	17
	MSTRG.11667	14
	MSTRG.11668	14
	MSTRG.11669	12
	MSTRG.11670	20
	MSTRG.11672	4
	MSTRG.11674	4
	MSTRG.11675	5
	MSTRG.11676	5
	MSTRG.11677	5
	MSTRG.11678	5
	MSTRG.11680	12
	MSTRG.11684	23
	MSTRG.11685	5
	MSTRG.11686	5
	MSTRG.11688	12
	MSTRG.11689	10
	MSTRG.11692	18
	MSTRG.11693	23
	MSTRG.11694	23
	MSTRG.11696	9
	MSTRG.11698	18
	MSTRG.11699	9
	MSTRG.11702	25
	MSTRG.11704	24
	MSTRG.11705	8
	MSTRG.11706	17
	MSTRG.11707	8
	MSTRG.11709	10
	MSTRG.11716	10
	MSTRG.11717	18
	MSTRG.11718	17
	MSTRG.11719	17
	MSTRG.1172	1
	MSTRG.11721	17
	MSTRG.11722	30
	MSTRG.11723	11
	MSTRG.11725	26
	MSTRG.11732	5
	MSTRG.11737	3
	MSTRG.11739	3
	MSTRG.1174	20
	MSTRG.11742	28
	MSTRG.11748	13
	MSTRG.11750	24
	MSTRG.11751	26
	MSTRG.11755	29
	MSTRG.1176	1
	MSTRG.11760	15
	MSTRG.11763	12
	MSTRG.11765	13
	MSTRG.11768	12
	MSTRG.1177	17
	MSTRG.11773	20
	MSTRG.11776	16
	MSTRG.1178	3
	MSTRG.11781	4
	MSTRG.11788	3
	MSTRG.11793	3
	MSTRG.11798	19
	MSTRG.11799	13
	MSTRG.11800	9
	MSTRG.11804	3
	MSTRG.11805	30
	MSTRG.11806	13
	MSTRG.11809	9
	MSTRG.1181	10
	MSTRG.11811	9
	MSTRG.11815	20
	MSTRG.11816	20
	MSTRG.11818	10
	MSTRG.11820	9
	MSTRG.11822	10
	MSTRG.11829	15
	MSTRG.11832	5
	MSTRG.11835	29
	MSTRG.1184	9
	MSTRG.11840	30
	MSTRG.11846	7
	MSTRG.11847	9
	MSTRG.11848	12
	MSTRG.11853	2
	MSTRG.11857	3
	MSTRG.11858	3
	MSTRG.11859	12
	MSTRG.11860	3
	MSTRG.11867	30
	MSTRG.11869	5
	MSTRG.11870	28
	MSTRG.11874	10
	MSTRG.11882	12
	MSTRG.11886	9
	MSTRG.11887	12
	MSTRG.11888	2
	MSTRG.11893	4
	MSTRG.11896	4
	MSTRG.11898	4
	MSTRG.1190	12
	MSTRG.11901	29
	MSTRG.11902	29
	MSTRG.11904	11
	MSTRG.11909	9
	MSTRG.1191	9
	MSTRG.11913	23
	MSTRG.11915	9
	MSTRG.11919	7
	MSTRG.1192	9
	MSTRG.11921	30
	MSTRG.11922	17
	MSTRG.11923	15
	MSTRG.11928	14
	MSTRG.11929	11
	MSTRG.11930	9
	MSTRG.11933	10
	MSTRG.11935	22
	MSTRG.11936	9
	MSTRG.11937	24
	MSTRG.11939	14
	MSTRG.1194	9
	MSTRG.11941	9
	MSTRG.11946	10
	MSTRG.1195	9
	MSTRG.11950	15
	MSTRG.11951	3
	MSTRG.11953	17
	MSTRG.11965	12
	MSTRG.11977	12
	MSTRG.11978	13
	MSTRG.11980	23
	MSTRG.11983	12
	MSTRG.11984	3
	MSTRG.11986	24
	MSTRG.11993	29
	MSTRG.11995	3
	MSTRG.12	12
	MSTRG.1200	13
	MSTRG.12003	21
	MSTRG.12004	21
	MSTRG.12005	21
	MSTRG.12010	21
	MSTRG.12011	21
	MSTRG.12012	21
	MSTRG.12013	21
	MSTRG.12018	1
	MSTRG.12021	18
	MSTRG.12022	18
	MSTRG.12025	22
	MSTRG.12026	22
	MSTRG.12028	4
	MSTRG.12031	4
	MSTRG.12033	12
	MSTRG.12035	30
	MSTRG.12036	28
	MSTRG.12038	9
	MSTRG.12040	12
	MSTRG.12058	4
	MSTRG.12059	18
	MSTRG.12064	10
	MSTRG.12070	29
	MSTRG.12071	20
	MSTRG.12073	28
	MSTRG.12074	30
	MSTRG.12076	10
	MSTRG.12084	12
	MSTRG.12087	15
	MSTRG.12090	9
	MSTRG.12092	22
	MSTRG.12093	9
	MSTRG.12094	22
	MSTRG.12096	9
	MSTRG.12099	19
	MSTRG.12101	9
	MSTRG.12104	10
	MSTRG.12109	12
	MSTRG.12113	12
	MSTRG.12120	19
	MSTRG.12123	23
	MSTRG.12124	8
	MSTRG.12125	8
	MSTRG.12126	13
	MSTRG.12127	20
	MSTRG.12128	28
	MSTRG.12131	10
	MSTRG.12133	12
	MSTRG.12135	17
	MSTRG.12137	17
	MSTRG.12140	23
	MSTRG.12147	13
	MSTRG.12151	20
	MSTRG.12153	18
	MSTRG.12155	19
	MSTRG.12157	30
	MSTRG.12160	17
	MSTRG.12161	17
	MSTRG.12163	19
	MSTRG.12164	17
	MSTRG.12166	8
	MSTRG.12171	4
	MSTRG.12176	29
	MSTRG.12181	9
	MSTRG.12190	3
	MSTRG.12191	3
	MSTRG.12192	3
	MSTRG.12193	9
	MSTRG.12194	4
	MSTRG.12195	5
	MSTRG.12197	24
	MSTRG.12201	19
	MSTRG.12203	4
	MSTRG.12204	6
	MSTRG.12206	27
	MSTRG.12207	6
	MSTRG.12208	20
	MSTRG.12215	21
	MSTRG.12216	17
	MSTRG.12217	17
	MSTRG.12218	21
	MSTRG.12220	19
	MSTRG.12221	9
	MSTRG.12222	7
	MSTRG.12224	29
	MSTRG.12225	23
	MSTRG.12237	17
	MSTRG.12238	17
	MSTRG.1224	5
	MSTRG.12244	24
	MSTRG.12245	4
	MSTRG.12249	12
	MSTRG.12256	3
	MSTRG.12257	12
	MSTRG.12258	12
	MSTRG.1226	5
	MSTRG.12267	3
	MSTRG.12272	9
	MSTRG.12274	9
	MSTRG.12277	9
	MSTRG.12278	21
	MSTRG.12283	15
	MSTRG.12286	12
	MSTRG.12289	21
	MSTRG.1229	19
	MSTRG.12297	21
	MSTRG.1230	5
	MSTRG.12303	10
	MSTRG.12306	17
	MSTRG.12308	6
	MSTRG.12309	3
	MSTRG.12310	9
	MSTRG.12313	21
	MSTRG.12316	13
	MSTRG.12319	17
	MSTRG.12323	6
	MSTRG.12325	9
	MSTRG.12327	9
	MSTRG.12329	19
	MSTRG.12334	4
	MSTRG.12336	4
	MSTRG.12337	8
	MSTRG.12338	4
	MSTRG.12339	23
	MSTRG.12343	3
	MSTRG.12346	13
	MSTRG.12347	13
	MSTRG.12350	7
	MSTRG.12353	19
	MSTRG.12354	29
	MSTRG.12357	11
	MSTRG.12358	5
	MSTRG.12361	4
	MSTRG.12366	15
	MSTRG.12369	10
	MSTRG.1237	3
	MSTRG.12375	9
	MSTRG.12378	4
	MSTRG.12382	2
	MSTRG.12385	30
	MSTRG.12386	26
	MSTRG.12390	9
	MSTRG.12397	11
	MSTRG.12398	8
	MSTRG.12399	8
	MSTRG.12401	3
	MSTRG.12402	3
	MSTRG.12418	15
	MSTRG.1242	26
	MSTRG.12421	26
	MSTRG.12423	3
	MSTRG.12426	3
	MSTRG.12428	18
	MSTRG.12430	7
	MSTRG.12439	16
	MSTRG.12441	9
	MSTRG.12443	28
	MSTRG.12446	10
	MSTRG.12449	15
	MSTRG.1245	13
	MSTRG.12458	23
	MSTRG.12459	15
	MSTRG.12460	24
	MSTRG.12466	9
	MSTRG.12469	25
	MSTRG.12471	3
	MSTRG.12475	5
	MSTRG.12477	3
	MSTRG.12478	3
	MSTRG.12479	9
	MSTRG.1248	11
	MSTRG.12480	12
	MSTRG.12481	3
	MSTRG.12489	12
	MSTRG.12494	21
	MSTRG.12496	21
	MSTRG.125	8
	MSTRG.1250	20
	MSTRG.12504	2
	MSTRG.12514	12
	MSTRG.12518	13
	MSTRG.12519	20
	MSTRG.12520	17
	MSTRG.12521	10
	MSTRG.12522	4
	MSTRG.12524	30
	MSTRG.12526	11
	MSTRG.12527	7
	MSTRG.12530	29
	MSTRG.12532	5
	MSTRG.12533	5
	MSTRG.12535	4
	MSTRG.12536	18
	MSTRG.12537	18
	MSTRG.12541	28
	MSTRG.12542	4
	MSTRG.12546	20
	MSTRG.12547	11
	MSTRG.12554	29
	MSTRG.12558	15
	MSTRG.12559	15
	MSTRG.12562	15
	MSTRG.12563	20
	MSTRG.12565	2
	MSTRG.12569	10
	MSTRG.12577	5
	MSTRG.12579	15
	MSTRG.12580	10
	MSTRG.12581	5
	MSTRG.12583	26
	MSTRG.12586	24
	MSTRG.1259	21
	MSTRG.12592	13
	MSTRG.12595	5
	MSTRG.12598	26
	MSTRG.12610	2
	MSTRG.12611	13
	MSTRG.12612	13
	MSTRG.12613	20
	MSTRG.12614	9
	MSTRG.12617	12
	MSTRG.12623	22
	MSTRG.12626	12
	MSTRG.12629	6
	MSTRG.1263	12
	MSTRG.12630	15
	MSTRG.12631	18
	MSTRG.12634	20
	MSTRG.12636	20
	MSTRG.12637	20
	MSTRG.1264	17
	MSTRG.12648	15
	MSTRG.12650	25
	MSTRG.12651	9
	MSTRG.12656	12
	MSTRG.12661	9
	MSTRG.12664	12
	MSTRG.12668	9
	MSTRG.12676	17
	MSTRG.12679	24
	MSTRG.12684	13
	MSTRG.12685	5
	MSTRG.12688	15
	MSTRG.12689	3
	MSTRG.12692	24
	MSTRG.12695	9
	MSTRG.12696	3
	MSTRG.12697	3
	MSTRG.12700	2
	MSTRG.12701	2
	MSTRG.12702	26
	MSTRG.12703	2
	MSTRG.12704	15
	MSTRG.12705	20
	MSTRG.12706	2
	MSTRG.12707	11
	MSTRG.12708	2
	MSTRG.12710	2
	MSTRG.12712	20
	MSTRG.12716	4
	MSTRG.12718	19
	MSTRG.12719	17
	MSTRG.12721	4
	MSTRG.12725	17
	MSTRG.12726	3
	MSTRG.12727	19
	MSTRG.12728	19
	MSTRG.12729	19
	MSTRG.12731	20
	MSTRG.12732	4
	MSTRG.12734	20
	MSTRG.12741	16
	MSTRG.12743	17
	MSTRG.12744	22
	MSTRG.12745	22
	MSTRG.12746	22
	MSTRG.12747	28
	MSTRG.12750	3
	MSTRG.12751	3
	MSTRG.12752	4
	MSTRG.12753	28
	MSTRG.12755	20
	MSTRG.12757	2
	MSTRG.12758	30
	MSTRG.12761	24
	MSTRG.12765	4
	MSTRG.12766	11
	MSTRG.12767	3
	MSTRG.12774	3
	MSTRG.12776	13
	MSTRG.12777	9
	MSTRG.12778	20
	MSTRG.12781	18
	MSTRG.12784	26
	MSTRG.12786	18
	MSTRG.12787	15
	MSTRG.12790	15
	MSTRG.12794	9
	MSTRG.12795	9
	MSTRG.12796	13
	MSTRG.12797	20
	MSTRG.128	3
	MSTRG.12804	21
	MSTRG.12805	21
	MSTRG.12809	20
	MSTRG.1281	20
	MSTRG.12811	3
	MSTRG.12812	5
	MSTRG.12813	9
	MSTRG.12816	30
	MSTRG.12817	28
	MSTRG.1282	20
	MSTRG.12821	29
	MSTRG.12827	15
	MSTRG.12828	15
	MSTRG.1283	14
	MSTRG.12835	20
	MSTRG.12837	20
	MSTRG.1284	14
	MSTRG.12841	5
	MSTRG.12842	20
	MSTRG.12844	20
	MSTRG.12845	20
	MSTRG.12847	5
	MSTRG.1285	7
	MSTRG.12850	20
	MSTRG.12851	5
	MSTRG.12852	9
	MSTRG.12859	8
	MSTRG.12861	30
	MSTRG.12862	5
	MSTRG.12863	9
	MSTRG.12867	12
	MSTRG.12868	12
	MSTRG.12869	24
	MSTRG.1287	4
	MSTRG.12871	19
	MSTRG.12872	5
	MSTRG.12873	5
	MSTRG.12876	19
	MSTRG.12877	19
	MSTRG.12878	27
	MSTRG.12879	9
	MSTRG.12880	16
	MSTRG.12881	18
	MSTRG.12882	5
	MSTRG.12883	20
	MSTRG.12885	12
	MSTRG.12887	22
	MSTRG.12888	17
	MSTRG.12890	8
	MSTRG.12891	20
	MSTRG.12894	3
	MSTRG.12897	7
	MSTRG.129	10
	MSTRG.1290	7
	MSTRG.12901	9
	MSTRG.12904	20
	MSTRG.12910	6
	MSTRG.12912	14
	MSTRG.12915	3
	MSTRG.12916	13
	MSTRG.12921	13
	MSTRG.12925	28
	MSTRG.12929	7
	MSTRG.1293	6
	MSTRG.12930	28
	MSTRG.12931	9
	MSTRG.12932	9
	MSTRG.12942	9
	MSTRG.12945	3
	MSTRG.12947	5
	MSTRG.12949	10
	MSTRG.1295	10
	MSTRG.12952	30
	MSTRG.12956	3
	MSTRG.1296	13
	MSTRG.12962	5
	MSTRG.12964	13
	MSTRG.12970	10
	MSTRG.12972	8
	MSTRG.12973	3
	MSTRG.12983	11
	MSTRG.12993	3
	MSTRG.12994	26
	MSTRG.13	9
	MSTRG.1300	5
	MSTRG.13002	15
	MSTRG.13004	3
	MSTRG.13005	3
	MSTRG.13009	29
	MSTRG.13015	3
	MSTRG.13016	16
	MSTRG.13018	29
	MSTRG.13019	12
	MSTRG.13022	9
	MSTRG.13023	20
	MSTRG.13026	15
	MSTRG.13027	15
	MSTRG.13028	15
	MSTRG.13030	19
	MSTRG.13031	16
	MSTRG.13032	16
	MSTRG.13037	16
	MSTRG.13038	16
	MSTRG.13039	16
	MSTRG.13040	16
	MSTRG.13043	28
	MSTRG.13048	9
	MSTRG.13050	19
	MSTRG.13055	17
	MSTRG.13057	23
	MSTRG.13063	5
	MSTRG.13064	20
	MSTRG.13066	13
	MSTRG.13068	23
	MSTRG.13069	20
	MSTRG.13070	3
	MSTRG.13072	15
	MSTRG.13074	5
	MSTRG.13075	5
	MSTRG.13076	29
	MSTRG.13077	5
	MSTRG.13078	24
	MSTRG.13079	25
	MSTRG.13080	25
	MSTRG.13083	3
	MSTRG.13084	26
	MSTRG.13089	23
	MSTRG.13090	5
	MSTRG.13092	9
	MSTRG.13093	9
	MSTRG.13094	20
	MSTRG.13096	8
	MSTRG.13097	22
	MSTRG.13101	29
	MSTRG.13103	9
	MSTRG.13104	4
	MSTRG.13105	15
	MSTRG.13109	9
	MSTRG.1311	19
	MSTRG.13110	18
	MSTRG.13111	9
	MSTRG.13114	22
	MSTRG.13115	22
	MSTRG.13117	10
	MSTRG.13118	10
	MSTRG.13119	10
	MSTRG.13120	19
	MSTRG.13121	13
	MSTRG.13122	20
	MSTRG.13123	29
	MSTRG.13125	28
	MSTRG.13136	12
	MSTRG.13139	24
	MSTRG.13146	3
	MSTRG.13147	15
	MSTRG.13149	3
	MSTRG.13150	15
	MSTRG.13152	22
	MSTRG.13156	24
	MSTRG.13159	9
	MSTRG.13160	5
	MSTRG.13161	4
	MSTRG.13163	9
	MSTRG.13168	10
	MSTRG.13169	6
	MSTRG.13171	20
	MSTRG.13173	15
	MSTRG.13175	9
	MSTRG.13179	9
	MSTRG.13182	9
	MSTRG.13186	9
	MSTRG.13188	28
	MSTRG.13189	3
	MSTRG.13192	28
	MSTRG.13193	10
	MSTRG.13197	26
	MSTRG.13201	12
	MSTRG.13206	9
	MSTRG.13207	17
	MSTRG.13208	3
	MSTRG.13210	12
	MSTRG.13211	15
	MSTRG.13212	12
	MSTRG.13218	21
	MSTRG.13219	9
	MSTRG.1322	19
	MSTRG.13224	21
	MSTRG.13225	20
	MSTRG.13226	18
	MSTRG.13227	18
	MSTRG.13228	21
	MSTRG.13229	29
	MSTRG.1323	6
	MSTRG.13230	13
	MSTRG.13231	22
	MSTRG.13232	4
	MSTRG.13235	9
	MSTRG.13236	3
	MSTRG.13237	18
	MSTRG.13239	4
	MSTRG.13246	24
	MSTRG.13248	29
	MSTRG.1325	21
	MSTRG.13250	28
	MSTRG.13251	15
	MSTRG.13253	2
	MSTRG.13254	24
	MSTRG.13256	23
	MSTRG.13260	4
	MSTRG.13263	5
	MSTRG.13266	28
	MSTRG.13267	11
	MSTRG.1327	3
	MSTRG.13270	5
	MSTRG.13271	4
	MSTRG.13272	26
	MSTRG.13276	7
	MSTRG.13277	29
	MSTRG.13279	10
	MSTRG.13281	15
	MSTRG.13282	12
	MSTRG.13283	12
	MSTRG.13294	3
	MSTRG.13295	4
	MSTRG.13296	17
	MSTRG.13299	13
	MSTRG.13301	3
	MSTRG.13302	3
	MSTRG.13303	19
	MSTRG.13306	1
	MSTRG.13307	22
	MSTRG.13308	4
	MSTRG.13311	9
	MSTRG.13312	9
	MSTRG.13313	23
	MSTRG.13315	29
	MSTRG.13316	9
	MSTRG.13317	9
	MSTRG.13318	9
	MSTRG.13320	30
	MSTRG.13321	14
	MSTRG.13322	29
	MSTRG.13324	22
	MSTRG.13325	20
	MSTRG.13326	20
	MSTRG.13327	24
	MSTRG.1333	3
	MSTRG.13330	25
	MSTRG.13332	9
	MSTRG.13333	15
	MSTRG.13335	3
	MSTRG.13336	9
	MSTRG.13337	18
	MSTRG.13339	28
	MSTRG.1334	18
	MSTRG.13345	9
	MSTRG.13348	15
	MSTRG.13349	9
	MSTRG.1335	24
	MSTRG.13351	18
	MSTRG.13355	30
	MSTRG.13358	16
	MSTRG.13366	28
	MSTRG.13368	23
	MSTRG.13371	30
	MSTRG.13373	17
	MSTRG.13375	4
	MSTRG.13377	5
	MSTRG.13378	13
	MSTRG.13379	12
	MSTRG.13380	9
	MSTRG.13381	9
	MSTRG.13383	9
	MSTRG.13387	13
	MSTRG.13389	11
	MSTRG.1339	9
	MSTRG.13391	11
	MSTRG.13392	5
	MSTRG.13394	13
	MSTRG.13396	20
	MSTRG.13398	3
	MSTRG.13399	24
	MSTRG.134	10
	MSTRG.13401	4
	MSTRG.13402	9
	MSTRG.13404	17
	MSTRG.13406	9
	MSTRG.13411	18
	MSTRG.13413	17
	MSTRG.13416	11
	MSTRG.13418	11
	MSTRG.13419	13
	MSTRG.13420	17
	MSTRG.13421	11
	MSTRG.13422	1
	MSTRG.13423	11
	MSTRG.13425	1
	MSTRG.13426	1
	MSTRG.13427	1
	MSTRG.13428	1
	MSTRG.13429	7
	MSTRG.13430	1
	MSTRG.13431	1
	MSTRG.13433	1
	MSTRG.13437	11
	MSTRG.13438	11
	MSTRG.13439	11
	MSTRG.13440	11
	MSTRG.13441	11
	MSTRG.13443	1
	MSTRG.13445	1
	MSTRG.13446	1
	MSTRG.13447	1
	MSTRG.13448	11
	MSTRG.13450	2
	MSTRG.13452	2
	MSTRG.13453	1
	MSTRG.13454	2
	MSTRG.13456	8
	MSTRG.13457	10
	MSTRG.13459	17
	MSTRG.13460	20
	MSTRG.13462	21
	MSTRG.13463	19
	MSTRG.13465	5
	MSTRG.13467	29
	MSTRG.13469	29
	MSTRG.1347	9
	MSTRG.13470	1
	MSTRG.13472	18
	MSTRG.13476	17
	MSTRG.1348	14
[truncated: 12,829 more rows]
