# Supplementary material for: Dynamics of microRNA expression during mouse prenatal development
Source: HighWire-hosted journal article supplement (doi:10.1101/gr.248997.119), 2019-10-23
Supplement: Supplemental_Table_S11.xlsx [file Supplemental_Table_S11.xlsx]

## Sheet: Sheet1
	Target enrichment matrix for miRNA-mRNA cluster interactions
		gC1	gC2	gC3	gC4	gC5	gC6	gC7	gC8	gC9	gC10	gC11	gC12	gC13	gC14	gC15	gC16	gC17	gC18	gC19	gC20	gC21	gC22	gC23	gC24	gC25	gC26	gC27	gC28	gC29	gC30
	miC1	0.523321	0.804445	0.00734713	0.753387	0.0617434	0.0796134	0.0469671	0.109263	0.321372	0.409249	0.766217	0.690887	0.0503353	0.653579	0.00856632	0.011242	0.833182	0.000852168	0.00351614	0.00493962	0.0775417	0.0872471	1	8.34095e-05	0.157969	0.752532	0.981023	9.94909e-05	0.72124	0.890096
	miC2	1	0.236649	0.516695	1	0.000169949	0.302738	0.853114	0.0291404	0.0407261	0.877683	0.515439	0.205065	0.256015	1	0.0219317	0.0101459	0.173186	0.00349385	0.000458274	0.0168431	0.00438324	0.00097262	0.922866	0.0128356	0.17766	0.860491	0.355328	0.00160194	0.196727	1
	miC3	0.147619	0.633828	0.0790882	0.228995	0.00452974	0.00401304	0.59737	0.356024	0.131046	0.378463	0.0979683	1.38827e-05	0.0712804	0.0153412	0.00561937	0.0895321	0.283478	0.00256394	0.000605265	0.00216074	0.002236	0.0163598	0.766325	0.544347	0.548481	0.969409	0.428743	0.166781	0.00183893	0.292447
	miC4	0.0145474	0.813088	0.0622471	0.448953	0.000542726	0.00739457	0.0145547	0.247552	0.189655	0.714081	0.81534	0.0183296	0.00069723	0.0667937	0.00379525	0.0416337	0.48269	0.0063192	3.9163e-05	0.000152372	0.138129	1.61363e-07	0.659055	0.0891077	0.723589	0.544528	0.508967	0.00388465	0.000231467	0.883666
	miC5	0.411059	0.155689	0.419075	1	0.00556404	0.0708387	0.396608	0.117575	0.00889619	0.118077	0.0820664	0.0100405	0.0585726	0.0097193	0.00103869	0.101846	0.641659	3.79753e-05	6.62739e-07	0.0658113	0.0112317	1.38131e-05	0.169963	0.254024	0.101085	0.848135	0.4216	0.201976	0.000329979	0.188444
	miC6	0.891498	0.36542	0.65889	0.81722	0.00363397	1	0.180956	0.972882	0.0117518	0.550275	0.413958	0.0252166	0.182652	0.0136545	0.0148471	0.00384918	0.0513457	0.00403551	1.54566e-05	0.00381445	0.00917249	0.000647203	0.795769	0.493396	0.0275098	0.744247	0.326133	5.23417e-05	0.0543934	0.647121
	miC7	1	0.145348	0.365996	0.430264	0.00453802	0.851254	0.241743	0.418019	0.00786379	1	0.15025	0.000122428	0.0799608	0.00466722	0.298224	0.0689402	0.0184784	0.00068817	0.0966737	0.00200448	0.0427401	0.850015	0.657081	0.548163	0.0950441	0.863848	0.895877	0.0666709	5.73781e-05	0.579585
	miC8	1	0.328705	0.121115	0.434191	0.000454177	0.556951	1	0.0127989	0.745389	0.65378	0.759232	0.000142536	0.21388	0.0541206	0.0131529	0.852877	0.564206	0.00532154	0.0724281	0.00724232	0.316917	1.89968e-05	0.888304	0.018986	0.0146348	0.967642	1	0.611678	0.0691821	0.934221
	miC9	0.0766392	0.50468	0.0306928	0.360305	0.277776	0.130498	0.833243	0.843251	0.364693	0.563195	1	0.227421	0.791784	0.227248	0.000697956	0.669842	0.671381	0.0883129	0.10058	0.125738	0.147292	0.231886	0.925069	0.237883	0.0257422	0.597645	1	0.0329659	0.0289645	0.0366006
	miC10	0.824138	0.936161	0.448945	0.702833	0.182958	0.963788	0.470902	0.547162	0.298061	0.334569	1	0.344425	0.408599	0.891781	0.856072	0.102587	0.0260432	0.137608	0.0198238	0.00047594	0.00202188	0.509211	0.985557	0.0925167	0.00689539	0.578495	1	0.132018	0.196892	0.871912
	miC11	0.00190998	0.0288528	0.184776	0.0333208	0.00981508	0.000473192	0.204844	0.00865695	0.062847	0.345537	0.980325	0.000133357	0.291224	0.0160006	0.0163142	0.00541407	0.0313001	2.75189e-05	5.05217e-06	0.0377832	0.00466347	0.080817	0.215201	0.859095	0.00463962	0.378125	0.562884	0.326612	3.37365e-08	0.0155693
	miC12	0.513727	0.686611	0.164119	0.157497	0.000674297	0.0119957	0.818451	0.100715	0.182829	0.634567	1	0.103856	0.0721405	0.0400742	0.00149661	0.207586	0.211725	0.327726	0.00486666	0.00595411	0.076174	2.742e-06	0.540166	0.273029	0.169484	0.440662	0.118646	0.0709624	0.0336461	0.812092
	miC13	0.798227	0.0845925	0.724424	0.30523	0.00145251	0.0975853	0.647267	0.403191	0.00298975	0.40492	0.771881	0.667168	0.586218	0.378041	0.0213523	0.0928069	0.852708	0.121373	0.0284105	0.0627094	0.511306	0.00397638	0.931796	0.0517509	0.250643	0.634989	0.4338	4.02392e-05	0.00712773	0.34444
	miC14	0.745936	0.00170025	0.510192	0.113063	0.0058744	0.0572213	0.776456	0.0680331	0.00168515	0.426539	0.161883	0.0103506	0.548534	0.0465567	0.00149333	0.00238568	0.00894662	0.0147562	0.000392761	0.000458523	0.0134443	0.0264224	0.0517935	0.489062	0.0150033	0.498645	0.338865	0.0394812	0.0148424	0.230755
	miC15	0.00157886	0.885872	0.25388	0.458449	0.0697282	0.583836	0.88857	0.720085	0.854556	0.551087	0.6858	2.74966e-06	0.238064	0.0401115	0.414279	0.945708	0.0274759	0.115229	0.570712	0.955866	0.762417	0.323233	0.793961	0.71259	0.7169	1	1	0.0590654	0.0463587	0.793627
	miC16	0.20633	0.052559	0.553157	0.138996	0.0562768	0.141132	0.0211111	0.0538312	0.786593	0.163455	0.05629	0.869592	0.737411	0.423346	0.0237131	0.0258684	1	0.00331032	0.000682551	0.0012005	0.40924	0.000179866	0.833646	0.851144	0.00121242	0.467605	0.732902	0.00870893	0.464234	0.114977
