# Supplementary material for: Dynamics of microRNA expression during mouse prenatal development
Source: HighWire-hosted journal article supplement (doi:10.1101/gr.248997.119), 2019-10-23
Supplement: Supplemental_Table_S12.xlsx [file Supplemental_Table_S12.xlsx]

## Sheet: Sheet1
	List of all the significant miRNA-mRNA cluster interactions
	miC	gC
	3	12
	15	12
	5	18
	11	18
	4	19
	5	19
	6	19
	11	19
	4	22
	5	22
	8	22
	12	22
	1	24
	1	28
	6	28
	13	28
	7	29
	11	29
